# Supplementary material for: Tumor Microenvironment Heterogeneity-Based Score System Predicts Clinical Prognosis and Response to Immune Checkpoint Blockade in Multiple Colorectal Cancer Cohorts
Source: Front Mol Biosci. 2022 Jun 28;9:884839. doi: 10.3389/fmolb.2022.884839 (PMC9274205; doi:10.3389/fmolb.2022.884839)
Supplement: Supplementary file 1 [file Table2.xlsx]

## Sheet: survival_data_GEO_comb
	futime(month)	fustatus
GSM1875897	5.58522	1
GSM1875898	13.6674	1
GSM1875899	2.49692	1
GSM1875900	70.0123	0
GSM1875901	19.9425	1
GSM1875902	58.7433	1
GSM1875903	9.56057	1
GSM1875904	46.2916	0
GSM1875905	3.44969	1
GSM1875906	41.8563	1
GSM1875907	9.06776	1
GSM1875908	58.152	0
GSM1875909	22.0452	1
GSM1875910	9.65914	1
GSM1875911	39.9507	1
GSM1875912	47.6058	1
GSM1875913	13.076	1
GSM1875914	53.3881	0
GSM1875915	52.4025	0
GSM1875916	15.9343	1
GSM1875917	13.1417	1
GSM1875918	47.8357	0
GSM1875919	4.33676	1
GSM1875920	39.5565	0
GSM1875921	19.6468	1
GSM1875922	19.8111	1
GSM1875923	37.9795	1
GSM1875924	37.191	1
GSM1875925	17.9713	1
GSM1875926	18.694	1
GSM1875927	5.8809	1
GSM1875928	28.9446	1
GSM1875929	17.1499	1
GSM1875930	25.7906	1
GSM1875931	33.5113	0
GSM1875932	23.7864	1
GSM1875933	26.7105	0
GSM1875934	24.6735	0
GSM1875935	24.9035	0
GSM1875936	31.2115	0
GSM1875937	18.7926	1
GSM1875938	11.039	1
GSM1875939	15.3429	1
GSM1875940	15.77	0
GSM1875941	42.0862	1
GSM1875942	23.655	1
GSM1875943	24.8049	1
GSM1875944	12.386	1
GSM1875945	17.3799	1
GSM1875946	19.1211	0
GSM1875947	5.74949	1
GSM1875948	17.6427	1
GSM1875949	7.52361	1
GSM1875950	18.4312	1
GSM1875951	6.37372	1
GSM1875952	13.4374	1
GSM1875953	5.48665	1
GSM1875954	37.7823	0
GSM1875955	76.1232	0
GSM1875956	14.7515	1
GSM1875957	59.8275	1
GSM1875958	55.9836	0
GSM1875959	4.23819	1
GSM1875960	19.2197	1
GSM1875961	19.9097	1
GSM1875962	50.3984	0
GSM1875963	45.9959	0
GSM1875964	23.8522	1
GSM437270	54.0493	0
GSM437271	63.9123	0
GSM437272	46.2904	1
GSM437273	60.0329	0
GSM437274	48.263	1
GSM437275	60.0329	0
GSM437276	60.5589	0
GSM437277	57.074	0
GSM437278	55.8575	0
GSM437279	64.8658	0
GSM437280	54.7397	0
GSM437281	57.9616	0
GSM437282	57.2384	0
GSM437283	59.7699	0
GSM437284	62.4	0
GSM437285	54.5096	0
GSM437286	3.61644	1
GSM437287	49.4466	0
GSM437288	64.1753	0
GSM437289	50.2027	0
GSM437290	30.8384	1
GSM437291	58.2575	0
GSM437292	40.9973	1
GSM437293	8.15342	1
GSM437294	52.1096	0
GSM437295	5.2274	1
GSM437296	111.485	0
GSM437297	7.82466	1
GSM437298	68.6137	0
GSM437299	68.0548	0
GSM437300	50.137	0
GSM437301	70.8493	0
GSM437302	74.3014	0
GSM437303	46.4548	0
GSM437304	76.7671	0
GSM437305	23.4082	1
GSM437306	21.6329	1
GSM437307	33.1068	1
GSM437308	69.1726	0
GSM437309	46.9808	0
GSM437310	53.2603	0
GSM437311	54.1808	0
GSM437312	40.6685	0
GSM437313	40.7342	0
GSM437314	13.8411	1
GSM437315	70.4548	0
GSM437316	36	1
GSM437317	1.54521	1
GSM437318	17.6548	1
GSM437319	12.6575	1
GSM437320	6.90411	1
GSM437321	32.5151	1
GSM437322	16.1425	1
GSM437324	41.4247	0
GSM437093	142.55	0
GSM437094	122.72	0
GSM437095	28.96	1
GSM437096	119.21	0
GSM437097	59.53	0
GSM437098	68.81	1
GSM437099	82.29	0
GSM437100	110.82	0
GSM437101	65.88	1
GSM437102	84.13	0
GSM437103	16.47	1
GSM437104	89.75	0
GSM437105	76.07	0
GSM437106	67.82	0
GSM437107	52.24	0
GSM437108	64.1	0
GSM437109	55.13	0
GSM437110	57.79	0
GSM437111	50.1	0
GSM437112	43.79	0
GSM437113	30.27	0
GSM437114	3.64	0
GSM437115	36.59	0
GSM437116	20.02	0
GSM437117	118.58	0
GSM437118	55.33	0
GSM437119	134.86	1
GSM437120	127.29	0
GSM437121	120.62	0
GSM437122	106.94	0
GSM437123	11.7	1
GSM437124	28.79	1
GSM437125	26.82	1
GSM437126	52.5	1
GSM437127	24.03	1
GSM437128	88.99	0
GSM437129	102.44	0
GSM437130	33.73	1
GSM437131	85.28	0
GSM437132	26.53	0
GSM437133	37.31	1
GSM437134	86.43	0
GSM437135	55.92	0
GSM437136	70.65	0
GSM437137	76.04	0
GSM437138	79.13	0
GSM437139	83.99	0
GSM437140	80.25	0
GSM437141	40.6	0
GSM437142	95.37	0
GSM437143	31.06	1
GSM437144	37.31	1
GSM437145	22.02	1
GSM437146	63.25	0
GSM437147	34.09	0
GSM437148	52.14	0
GSM437149	66.04	0
GSM437150	59.96	0
GSM437151	47.86	0
GSM437152	58.45	0
GSM437153	45.99	0
GSM437154	60.42	0
GSM437155	37.67	0
GSM437156	15.71	0
GSM437157	39.25	0
GSM437158	49.87	0
GSM437159	25.24	0
GSM437160	44.97	0
GSM437161	35.9	0
GSM437162	26.66	0
GSM437163	36.78	0
GSM437164	41.52	0
GSM437165	22.22	0
GSM437166	33.2	0
GSM437167	39.68	0
GSM437168	25.61	0
GSM437169	83.99	0
GSM437170	15.05	0
GSM437171	8.38	0
GSM437172	18.18	0
GSM437173	27.15	1
GSM437174	24.26	1
GSM437175	105.17	0
GSM437176	11.76	1
GSM437177	70.45	1
GSM437178	95.07	0
GSM437179	112.33	0
GSM437180	27.51	1
GSM437181	45.92	1
GSM437182	54.04	1
GSM437183	103.98	0
GSM437184	6.11	1
GSM437185	99.51	0
GSM437186	20.44	1
GSM437187	76.6	1
GSM437188	10.02	1
GSM437189	41.45	1
GSM437190	96.26	0
GSM437191	85.61	0
GSM437192	78.87	0
GSM437193	22.25	1
GSM437194	74.53	0
GSM437195	59.07	1
GSM437196	47.8	1
GSM437197	5.68	1
GSM437198	79.39	0
GSM437199	74.07	0
GSM437200	50.76	1
GSM437201	67.82	1
GSM437202	70.84	0
GSM437203	50.59	0
GSM437204	34.58	1
GSM437205	38.72	1
GSM437206	54.9	1
GSM437207	67.92	0
GSM437208	58.45	0
GSM437209	59.34	0
GSM437210	54.54	0
GSM437211	19.03	1
GSM437212	26.26	1
GSM437213	52.86	0
GSM437214	32.05	1
GSM437215	55.95	0
GSM437216	56.67	0
GSM437217	50.43	0
GSM437218	4.24	1
GSM437219	49.11	0
GSM437220	49.57	0
GSM437221	50.49	0
GSM437222	63.05	0
GSM437223	49.24	1
GSM437225	31.36	0
GSM437226	40.3	0
GSM437227	116.64	0
GSM437228	31.92	0
GSM437229	19.98	0
GSM437230	24.62	0
GSM437231	18.54	1
GSM437232	130.75	0
GSM437233	17.62	1
GSM437234	5.32	1
GSM437235	2.36	1
GSM437236	5.72	1
GSM437237	15.28	1
GSM437238	95.07	0
GSM437239	4.96	1
GSM437240	28.89	1
GSM437241	3.25	1
GSM437243	18.77	1
GSM437244	57.73	1
GSM437245	14.39	1
GSM437246	5.12	1
GSM437247	4.99	1
GSM437248	33.17	1
GSM437249	50.53	1
GSM437250	5.72	1
GSM437251	8.02	1
GSM437252	34.02	1
GSM437253	1.44	1
GSM437254	36.95	1
GSM437255	60.75	0
GSM437256	37.44	1
GSM437257	23.07	1
GSM437258	19.85	1
GSM437259	31.85	0
GSM437260	8.61	1
GSM437261	42.27	0
GSM437262	15.25	1
GSM437263	14.56	1
GSM437264	9.96	1
GSM437265	8.94	1
GSM437266	32.67	0
GSM437267	2.07	1
GSM437268	22.78	1
GSM437269	22.35	0
GSM971957	10	1
GSM971958	9	1
GSM971959	52	0
GSM971960	74	0
GSM971961	32	1
GSM971962	73	0
GSM971963	20	1
GSM971964	35	0
GSM971965	33	0
GSM971966	63	0
GSM971967	31	1
GSM971968	112	0
GSM971969	63	0
GSM971970	86	0
GSM971971	65	0
GSM971972	75	0
GSM971973	46	0
GSM971974	56	0
GSM971975	46	0
GSM971976	36	0
GSM971977	49	0
GSM971978	109	0
GSM971979	53	0
GSM971980	59	0
GSM971981	48	0
GSM971982	42	1
GSM971983	87	0
GSM971984	81	0
GSM971985	7	0
GSM971986	68	0
GSM971987	68	0
GSM971988	18	1
GSM971989	24	1
GSM971990	12	1
GSM971991	55	1
GSM971992	20	1
GSM971993	56	0
GSM971994	43	0
GSM971995	25	0
GSM971996	76	0
GSM971997	89	0
GSM971998	23	1
GSM972000	9	0
GSM972001	73	0
GSM972002	26	0
GSM972003	27	1
GSM972004	89	0
GSM972005	44	0
GSM972006	23	1
GSM972007	2	1
GSM972008	72	1
GSM972009	10	1
GSM972010	46	1
GSM972011	20	1
GSM972012	101	0
GSM972013	43	1
GSM972014	29	1
GSM972015	91	0
GSM972016	16	1
GSM972017	43	0
GSM972018	117	0
GSM972019	25	1
GSM972020	78	0
GSM972021	37	1
GSM972022	82	0
GSM972023	16	0
GSM972024	43	0
GSM972025	53	0
GSM972026	34	1
GSM972027	94	0
GSM972028	78	0
GSM972029	36	0
GSM972030	52	0
GSM972031	55	0
GSM972032	60	0
GSM972033	50	0
GSM972034	50	0
GSM972035	39	0
GSM972036	50	0
GSM972037	33	0
GSM972039	52	1
GSM972040	63	0
GSM972041	55	0
GSM972042	51	0
GSM972043	27	1
GSM972044	42	0
GSM972045	11	1
GSM972046	58	0
GSM972047	33	0
GSM972048	30	0
GSM972049	26	0
GSM972050	19	0
GSM972051	28	1
GSM972052	15	0
GSM972053	29	0
GSM972054	26	0
GSM972055	93	0
GSM972056	92	0
GSM972057	26	1
GSM972058	60	0
GSM972059	59	0
GSM972060	82	0
GSM972061	43	1
GSM972062	23	1
GSM972063	70	0
GSM972064	22	1
GSM972065	46	0
GSM972066	49	0
GSM972067	183	1
GSM972068	22	1
GSM972069	201	0
GSM972070	68	1
GSM972071	183	0
GSM972072	172	0
GSM972073	163	0
GSM972074	75	1
GSM972075	44	1
GSM972076	153	0
GSM972077	31	1
GSM972078	145	1
GSM972079	168	0
GSM972080	165	0
GSM972081	26	0
GSM972082	132	1
GSM972083	127	0
GSM972084	129	0
GSM972085	97	0
GSM972086	43	1
GSM972087	32	1
GSM972088	79	0
GSM972089	87	0
GSM972090	69	0
GSM972091	70	0
GSM972092	47	0
GSM972093	74	0
GSM972094	61	0
GSM972095	67	0
GSM972096	15	0
GSM972097	12	1
GSM972098	15	1
GSM972099	15	0
GSM972100	25	0
GSM972101	35	0
GSM972102	46	0
GSM972103	58	0
GSM972104	41	0
GSM972105	32	0
GSM972106	72	0
GSM972107	60	1
GSM972108	103	0
GSM972109	36	0
GSM972110	7	1
GSM972111	22	0
GSM972112	32	1
GSM972113	27	0
GSM972114	46	0
GSM972115	75	1
GSM972116	29	1
GSM972117	32	0
GSM972118	30	0
GSM972119	37	0
GSM972120	36	0
GSM972121	35	0
GSM972122	19	1
GSM972123	71	0
GSM972124	75	0
GSM972125	68	0
GSM972126	63	0
GSM972127	85	0
GSM972128	93	0
GSM972129	11	0
GSM972130	55	0
GSM972131	86	0
GSM972132	61	1
GSM972133	53	1
GSM972134	14	1
GSM972135	13	1
GSM972136	130	0
GSM972137	129	0
GSM972138	53	1
GSM972139	102	0
GSM972140	172	0
GSM972141	84	0
GSM972142	35	1
GSM972143	154	0
GSM972144	121	0
GSM972145	135	0
GSM972146	66	0
GSM972147	140	0
GSM972148	127	0
GSM972149	132	0
GSM972150	109	0
GSM972151	77	0
GSM972152	56	0
GSM972153	66	1
GSM972154	44	1
GSM972155	24	1
GSM972156	112	1
GSM972157	118	0
GSM972158	120	0
GSM972159	93	0
GSM972160	77	0
GSM972161	11	1
GSM972162	77	0
GSM972163	41	0
GSM972164	69	1
GSM972165	87	1
GSM972166	12	1
GSM972167	45	1
GSM972168	8	1
GSM972169	164	0
GSM972170	73	0
GSM972171	130	0
GSM972172	5	1
GSM972173	26	1
GSM972174	97	0
GSM972175	43	1
GSM972176	36	1
GSM972177	22	1
GSM972178	67	0
GSM972179	18	1
GSM972180	24	1
GSM972181	34	1
GSM972182	58	1
GSM972183	32	1
GSM972184	39	1
GSM972185	39	0
GSM972186	47	1
GSM972187	49	0
GSM972188	22	0
GSM972189	192	0
GSM972190	108	0
GSM972191	122	0
GSM972192	158	0
GSM972193	73	0
GSM972194	83	0
GSM972195	120	0
GSM972196	73	0
GSM972197	50	0
GSM972198	57	0
GSM972199	66	0
GSM972200	54	0
GSM972201	67	0
GSM972202	53	0
GSM972203	54	0
GSM972204	44	0
GSM972205	35	1
GSM972206	42	0
GSM972207	82	0
GSM972208	25	1
GSM972209	13	1
GSM972210	46	1
GSM972211	57	0
GSM972212	18	1
GSM972214	2	1
GSM972215	47	0
GSM972216	94	0
GSM972217	70	0
GSM972218	7	1
GSM972219	53	0
GSM972221	65	0
GSM972222	57	0
GSM972223	33	1
GSM972224	25	1
GSM972225	37	0
GSM972226	20	0
GSM972227	20	1
GSM972230	27	0
GSM972231	14	0
GSM972232	21	0
GSM972233	15	0
GSM972234	10	1
GSM972235	7	0
GSM972236	12	0
GSM972237	25	0
GSM972238	19	0
GSM972239	14	0
GSM972240	14	0
GSM972241	17	1
GSM972242	17	0
GSM972243	2	0
GSM972244	14	0
GSM972247	6	0
GSM972248	14	0
GSM972249	14	0
GSM972250	12	0
GSM972251	7	1
GSM972252	16	0
GSM972253	16	0
GSM972254	14	0
GSM972255	5	0
GSM972256	19	0
GSM972257	21	1
GSM972259	29	0
GSM972260	13	0
GSM972261	7	1
GSM972262	5	0
GSM972263	76	0
GSM972264	73	0
GSM972265	60	0
GSM972266	20	1
GSM972267	67	1
GSM972268	48	0
GSM972269	79	0
GSM972270	65	0
GSM972271	14	1
GSM972272	15	1
GSM972273	16	1
GSM972274	57	0
GSM972275	4	1
GSM972276	43	0
GSM972277	51	0
GSM972278	45	0
GSM972279	52	0
GSM972280	46	1
GSM972281	56	0
GSM972282	51	0
GSM972283	51	0
GSM972284	27	1
GSM972285	2	1
GSM972286	37	0
GSM972287	43	0
GSM972288	35	1
GSM972289	17	1
GSM972290	39	0
GSM972291	32	0
GSM972292	25	0
GSM972293	50	0
GSM972294	25	0
GSM972295	61	0
GSM972296	22	0
GSM972297	46	1
GSM972298	9	0
GSM972299	41	1
GSM972300	41	0
GSM972301	105	1
GSM972302	27	1
GSM972303	19	0
GSM972304	30	0
GSM972305	31	0
GSM972306	56	0
GSM972307	82	0
GSM972308	92	0
GSM972309	95	0
GSM972310	25	0
GSM972311	106	0
GSM972312	97	1
GSM972313	91	1
GSM972314	46	0
GSM972315	84	0
GSM972316	83	0
GSM972317	30	1
GSM972318	36	1
GSM972319	78	1
GSM972320	58	1
GSM972321	9	0
GSM972322	86	1
GSM972323	80	0
GSM972324	82	0
GSM972325	71	0
GSM972326	85	0
GSM972327	83	0
GSM972328	82	0
GSM972329	78	0
GSM972330	86	0
GSM972331	75	1
GSM972332	87	0
GSM972333	80	0
GSM972334	77	0
GSM972335	46	1
GSM972336	50	0
GSM972337	41	1
GSM972338	74	0
GSM972339	76	0
GSM972340	84	0
GSM972341	69	0
GSM972342	28	0
GSM972343	52	1
GSM972344	75	0
GSM972345	42	1
GSM972346	72	1
GSM972347	7	0
GSM972348	62	0
GSM972349	5	1
GSM972350	9	1
GSM972351	24	0
GSM972352	139	0
GSM972353	133	0
GSM972354	95	1
GSM972355	34	1
GSM972356	53	1
GSM972357	42	1
GSM972358	81	0
GSM972359	30	1
GSM972360	141	0
GSM972361	19	1
GSM972362	98	0
GSM972363	140	0
GSM972364	103	0
GSM972365	47	0
GSM972366	24	1
GSM972367	95	0
GSM972368	92	0
GSM972369	102	1
GSM972370	71	1
GSM972371	81	0
GSM972372	50	1
GSM972373	79	0
GSM972374	90	0
GSM972375	117	0
GSM972376	87	0
GSM972377	82	0
GSM972378	86	0
GSM972379	95	0
GSM972380	15	1
GSM972381	48	1
GSM972382	38	1
GSM972383	92	0
GSM972384	106	1
GSM972385	63	0
GSM972386	90	0
GSM972387	123	0
GSM972388	83	1
GSM972389	93	0
GSM972390	8	1
GSM972391	52	1
GSM972392	44	1
GSM972393	47	1
GSM972394	11	1
GSM972395	147	0
GSM972396	107	0
GSM972397	105	0
GSM972398	64	1
GSM972399	90	0
GSM972400	11	1
GSM972402	31	1
GSM972403	56	0
GSM972404	48	0
GSM972405	79	1
GSM972406	106	0
GSM972407	132	0
GSM972408	32	1
GSM972409	104	0
GSM972410	91	0
GSM972411	125	0
GSM972412	8	1
GSM972413	20	1
GSM972414	53	0
GSM972415	42	1
GSM972416	8	1
GSM972417	146	0
GSM972418	70	0
GSM972419	32	1
GSM972420	6	1
GSM972421	28	0
GSM972422	37	1
GSM972423	40	0
GSM972424	104	0
GSM972425	59	0
GSM972426	81	0
GSM972427	53	0
GSM972428	55	0
GSM972429	62	0
GSM972430	53	0
GSM972431	54	0
GSM972432	55	0
GSM972433	16	1
GSM972434	42	1
GSM972435	40	0
GSM972436	18	1
GSM972437	7	1
GSM972438	30	1
GSM972439	2	1
GSM972440	52	0
GSM972441	68	0
GSM972442	6	1
GSM972443	48	0
GSM972444	14	1
GSM972445	35	0
GSM972447	31	0
GSM972449	41	1
GSM972450	47	1
GSM972451	97	0
GSM972452	99	0
GSM972453	100	0
GSM972454	75	0
GSM972455	74	0
GSM972457	68	0
GSM972458	17	1
GSM972459	12	0
GSM972460	96	0
GSM972461	96	0
GSM972462	88	0
GSM972463	2	1
GSM972464	86	0
GSM972465	84	1
GSM972466	75	0
GSM972467	72	0
GSM972468	24	1
GSM972469	86	0
GSM972470	85	0
GSM972472	80	0
GSM972473	117	0
GSM972474	119	0
GSM972475	87	0
GSM972476	64	0
GSM972477	81	0
GSM972478	69	0
GSM972479	3	0
GSM972480	69	0
GSM972481	65	1
GSM972482	42	0
GSM972483	28	1
GSM972484	76	0
GSM972485	75	0
GSM972486	33	0
GSM972487	67	0
GSM972488	49	0
GSM972489	74	0
GSM972490	74	0
GSM972491	70	0
GSM972492	68	0
GSM972493	59	0
GSM972494	57	0
GSM972495	27	1
GSM972496	142	0
GSM972498	59	1
GSM972499	72	0
GSM972501	106	1
GSM972502	131	0
GSM972503	146	0
GSM972504	30	1
GSM972505	144	0
GSM972506	141	0
GSM972507	42	0
GSM972508	134	0
GSM972509	14	0
GSM972510	86	0
GSM972511	47	1
GSM972512	23	1
GSM972513	48	1
GSM972514	32	1
GSM972515	118	0
GSM972516	66	0
GSM972517	37	1
GSM972518	35	1
GSM972519	14	1
GSM972520	62	1
GSM972521	76	1
GSM972522	99	0
GSM1681353	131	0
GSM1681354	142	0
GSM1681355	141	0
GSM1681356	134	0
GSM1681357	123	0
GSM1681359	36	1
GSM1681360	30	1
GSM1681361	86	0
GSM1681362	86	0
GSM1681363	85	0
GSM1681364	85	0
GSM1681365	86	0
GSM1681367	76	0
GSM1681368	81	0
GSM1681369	65	1
GSM1681370	74	0
GSM1681371	68	0

## Sheet: survival_data_ucsc_coa
	futime(month)	fustatus
TCGA-3L-AA1B-01A	15.83	0
TCGA-4N-A93T-01A	4.87	0
TCGA-4T-AA8H-01A	12.83	0
TCGA-5M-AAT4-01A	1.63	1
TCGA-5M-AAT6-01A	9.67	1
TCGA-5M-AATE-01A	40	0
TCGA-A6-2671-01A	44.37	1
TCGA-A6-2672-01A	47.3	0
TCGA-A6-2672-01B	47.3	0
TCGA-A6-2674-01A	44.37	0
TCGA-A6-2674-01B	44.37	0
TCGA-A6-2675-01A	44.03	0
TCGA-A6-2676-01A	43.5	1
TCGA-A6-2677-01A	24.67	1
TCGA-A6-2677-01B	24.67	1
TCGA-A6-2678-01A	42.87	0
TCGA-A6-2679-01A	45.53	0
TCGA-A6-2680-01A	35.6	0
TCGA-A6-2681-01A	46.23	0
TCGA-A6-2682-01A	14.13	1
TCGA-A6-2683-01A	16.8	1
TCGA-A6-2684-01A	37.57	0
TCGA-A6-2684-01C	37.57	0
TCGA-A6-2685-01A	37.77	0
TCGA-A6-2686-01A	37.53	1
TCGA-A6-3807-01A	35.13	0
TCGA-A6-3808-01A	33.8	0
TCGA-A6-3809-01A	33.2	0
TCGA-A6-3809-01B	33.2	0
TCGA-A6-3810-01A	37.03	0
TCGA-A6-3810-01B	37.03	0
TCGA-A6-4105-01A	14.73	1
TCGA-A6-4107-01A	32.9	0
TCGA-A6-5656-01A	33.37	0
TCGA-A6-5656-01B	33.37	0
TCGA-A6-5657-01A	32.07	0
TCGA-A6-5659-01A	30.87	0
TCGA-A6-5659-01B	30.87	0
TCGA-A6-5660-01A	29.6	0
TCGA-A6-5661-01A	34	0
TCGA-A6-5661-01B	34	0
TCGA-A6-5662-01A	23.93	0
TCGA-A6-5664-01A	22.4	0
TCGA-A6-5665-01A	22.37	0
TCGA-A6-5665-01B	22.37	0
TCGA-A6-5666-01A	33.17	0
TCGA-A6-5667-01A	29.57	0
TCGA-A6-6137-01A	27.47	0
TCGA-A6-6138-01A	22.83	0
TCGA-A6-6140-01A	24.47	0
TCGA-A6-6141-01A	8.5	0
TCGA-A6-6142-01A	25.43	0
TCGA-A6-6648-01A	25.53	0
TCGA-A6-6649-01A	24.5	0
TCGA-A6-6650-01A	20.9	0
TCGA-A6-6650-01B	20.9	0
TCGA-A6-6651-01A	22.07	0
TCGA-A6-6652-01A	25.03	0
TCGA-A6-6653-01A	24.73	0
TCGA-A6-6654-01A	24.2	0
TCGA-A6-6780-01A	20.4	0
TCGA-A6-6780-01B	20.4	0
TCGA-A6-6781-01A	19.93	0
TCGA-A6-6781-01B	19.93	0
TCGA-A6-6782-01A	20.57	0
TCGA-A6-A565-01A	16.47	1
TCGA-A6-A566-01A	25.27	1
TCGA-A6-A567-01A	62.7	1
TCGA-A6-A56B-01A	57.03	1
TCGA-A6-A5ZU-01A	9.77	0
TCGA-AA-3488-01A	5.1	1
TCGA-AA-3489-01A	7.13	1
TCGA-AA-3494-01A	1.03	0
TCGA-AA-3495-01A	37.57	0
TCGA-AA-3496-01A	1.03	0
TCGA-AA-3502-01A	35.5	0
TCGA-AA-3506-01A	58.83	0
TCGA-AA-3509-01A	63.83	0
TCGA-AA-3510-01A	64.87	0
TCGA-AA-3511-01A	7.07	0
TCGA-AA-3514-01A	1.03	0
TCGA-AA-3516-01A	13.2	1
TCGA-AA-3517-01A	39.53	0
TCGA-AA-3518-01A	1.03	0
TCGA-AA-3519-01A	9.2	0
TCGA-AA-3520-01A	24.37	0
TCGA-AA-3522-01A	37.57	0
TCGA-AA-3524-01A	36.53	0
TCGA-AA-3526-01A	19.33	0
TCGA-AA-3530-01A	19.33	0
TCGA-AA-3531-01A	34.5	0
TCGA-AA-3532-01A	29.4	0
TCGA-AA-3534-01A	29.4	0
TCGA-AA-3538-01A	26.37	0
TCGA-AA-3542-01A	13.17	0
TCGA-AA-3544-01A	14.2	0
TCGA-AA-3548-01A	34.47	0
TCGA-AA-3549-01A	21.3	0
TCGA-AA-3552-01A	13.2	1
TCGA-AA-3553-01A	24.33	0
TCGA-AA-3554-01A	18.2	0
TCGA-AA-3555-01A	30.37	0
TCGA-AA-3556-01A	23.33	0
TCGA-AA-3560-01A	20.27	0
TCGA-AA-3561-01A	14.13	0
TCGA-AA-3562-01A	20.27	0
TCGA-AA-3655-01A	61.87	0
TCGA-AA-3660-01A	79.17	0
TCGA-AA-3662-01A	6.13	0
TCGA-AA-3663-01A	7.07	0
TCGA-AA-3664-01A	54.77	0
TCGA-AA-3666-01A	2.03	1
TCGA-AA-3667-01A	14.2	0
TCGA-AA-3673-01A	50.73	0
TCGA-AA-3675-01A	47.7	0
TCGA-AA-3678-01A	47.67	0
TCGA-AA-3679-01A	15.23	0
TCGA-AA-3680-01A	11.17	1
TCGA-AA-3681-01A	6.07	0
TCGA-AA-3685-01A	37.57	0
TCGA-AA-3688-01A	19.27	0
TCGA-AA-3692-01A	36.5	1
TCGA-AA-3696-01A	5.1	1
TCGA-AA-3697-01A	86.23	0
TCGA-AA-3710-01A	27.37	0
TCGA-AA-3713-01A	19.3	0
TCGA-AA-3715-01A	19.3	1
TCGA-AA-3811-01A	10.2	1
TCGA-AA-3812-01A	35.53	0
TCGA-AA-3815-01A	33.5	0
TCGA-AA-3819-01A	25.37	0
TCGA-AA-3821-01A	1.03	0
TCGA-AA-3831-01A	18.23	0
TCGA-AA-3833-01A	16.17	0
TCGA-AA-3837-01A	39.53	0
TCGA-AA-3841-01A	37.47	0
TCGA-AA-3842-01A	37.53	0
TCGA-AA-3844-01A	15.13	0
TCGA-AA-3846-01A	17.27	0
TCGA-AA-3848-01A	10.2	1
TCGA-AA-3851-01A	33.53	0
TCGA-AA-3854-01A	36.53	0
TCGA-AA-3855-01A	32.5	0
TCGA-AA-3858-01A	31.5	0
TCGA-AA-3860-01A	31.5	0
TCGA-AA-3861-01A	30.47	0
TCGA-AA-3862-01A	30.47	0
TCGA-AA-3864-01A	53.73	0
TCGA-AA-3866-01A	17.27	0
TCGA-AA-3867-01A	24.37	0
TCGA-AA-3869-01A	27.4	1
TCGA-AA-3870-01A	30.4	0
TCGA-AA-3875-01A	18.3	0
TCGA-AA-3877-01A	31.43	0
TCGA-AA-3930-01A	2.03	1
TCGA-AA-3939-01A	13.17	0
TCGA-AA-3941-01A	24.33	0
TCGA-AA-3947-01A	33.47	0
TCGA-AA-3949-01A	26.37	0
TCGA-AA-3950-01A	24.33	0
TCGA-AA-3952-01A	2.03	1
TCGA-AA-3955-01A	21.27	0
TCGA-AA-3956-01A	34.5	0
TCGA-AA-3966-01A	2.03	0
TCGA-AA-3968-01A	22.3	0
TCGA-AA-3970-01A	36.53	0
TCGA-AA-3971-01A	16.3	0
TCGA-AA-3972-01A	51.7	0
TCGA-AA-3973-01A	13.23	0
TCGA-AA-3975-01A	34.53	0
TCGA-AA-3976-01A	26.37	0
TCGA-AA-3977-01A	25.37	0
TCGA-AA-3979-01A	24.33	0
TCGA-AA-3980-01A	8.07	0
TCGA-AA-3982-01A	27.4	0
TCGA-AA-3986-01A	19.33	0
TCGA-AA-3989-01A	8.07	1
TCGA-AA-3994-01A	27.4	0
TCGA-AA-A004-01A	14.13	0
TCGA-AA-A00A-01A	38.57	0
TCGA-AA-A00D-01A	19.27	0
TCGA-AA-A00E-01A	30.43	0
TCGA-AA-A00F-01A	34.5	0
TCGA-AA-A00J-01A	18.3	0
TCGA-AA-A00K-01A	18.3	0
TCGA-AA-A00L-01A	38.57	0
TCGA-AA-A00N-01A	4.07	1
TCGA-AA-A00O-01A	27.4	0
TCGA-AA-A00Q-01A	42.6	0
TCGA-AA-A00U-01A	17.27	0
TCGA-AA-A00W-01A	15.2	0
TCGA-AA-A00Z-01A	22.3	0
TCGA-AA-A010-01A	35.47	0
TCGA-AA-A017-01A	15.23	0
TCGA-AA-A01C-01A	15.23	0
TCGA-AA-A01D-01A	11.13	1
TCGA-AA-A01F-01A	32.47	0
TCGA-AA-A01G-01A	12.17	0
TCGA-AA-A01I-01A	31.43	0
TCGA-AA-A01K-01A	31.43	0
TCGA-AA-A01P-01A	38.6	1
TCGA-AA-A01Q-01A	1.03	0
TCGA-AA-A01R-01A	35.5	0
TCGA-AA-A01S-01A	1.03	0
TCGA-AA-A01T-01A	33.5	0
TCGA-AA-A01V-01A	1.03	0
TCGA-AA-A01X-01A	26.37	0
TCGA-AA-A01Z-01A	37.53	0
TCGA-AA-A024-01A	39.6	1
TCGA-AA-A029-01A	52.7	0
TCGA-AA-A02E-01A	3	1
TCGA-AA-A02F-01A	40.53	0
TCGA-AA-A02H-01A	2.03	1
TCGA-AA-A02J-01A	5.1	1
TCGA-AA-A02K-01A	14.2	1
TCGA-AA-A02R-01A	22.33	1
TCGA-AA-A02W-01A	41.57	0
TCGA-AA-A02Y-01A	40.53	0
TCGA-AA-A03J-01A	41.53	0
TCGA-AD-5900-01A	12.33	0
TCGA-AD-6548-01A	21.67	0
TCGA-AD-6888-01A	15.73	1
TCGA-AD-6889-01A	84.4	1
TCGA-AD-6890-01A	24.87	0
TCGA-AD-6895-01A	25.43	0
TCGA-AD-6899-01A	5.87	1
TCGA-AD-6901-01A	22.73	1
TCGA-AD-6963-01A	27.8	0
TCGA-AD-6964-01A	11.03	1
TCGA-AD-6965-01A	26.83	0
TCGA-AD-A5EK-01A	16.67	0
TCGA-AU-3779-01A	14.7	0
TCGA-AU-6004-01A	27.47	0
TCGA-AY-4070-01A	16.53	1
TCGA-AY-5543-01A	33.47	0
TCGA-AY-6197-01A	21.73	0
TCGA-AY-6386-01A	18.07	0
TCGA-AY-A54L-01A	17.5	0
TCGA-AY-A69D-01A	18.1	0
TCGA-AY-A71X-01A	19.6	0
TCGA-AY-A8YK-01A	19.1	0
TCGA-AZ-4308-01A	110.8	0
TCGA-AZ-4313-01A	77	0
TCGA-AZ-4315-01A	59.2	0
TCGA-AZ-4323-01A	1.43	1
TCGA-AZ-4614-01A	5.73	1
TCGA-AZ-4615-01A	33.4	0
TCGA-AZ-4616-01A	5.2	1
TCGA-AZ-4682-01B	22.67	1
TCGA-AZ-4684-01A	65.9	0
TCGA-AZ-5403-01A	63.67	1
TCGA-AZ-5407-01A	89.43	0
TCGA-AZ-6598-01A	50.1	1
TCGA-AZ-6599-01A	6.87	1
TCGA-AZ-6600-01A	12.27	1
TCGA-AZ-6601-01A	101.4	1
TCGA-AZ-6603-01A	29.97	1
TCGA-AZ-6605-01A	5.3	1
TCGA-AZ-6606-01A	11.9	1
TCGA-AZ-6607-01A	3.23	1
TCGA-AZ-6608-01A	1.97	1
TCGA-CA-5254-01A	12.87	0
TCGA-CA-5255-01A	12.53	0
TCGA-CA-5256-01A	12.63	0
TCGA-CA-5796-01A	12.57	0
TCGA-CA-5797-01A	12.77	0
TCGA-CA-6715-01A	12.77	0
TCGA-CA-6716-01A	12.37	0
TCGA-CA-6717-01A	12.93	0
TCGA-CA-6718-01A	10.2	1
TCGA-CA-6719-01A	14.5	0
TCGA-CK-4947-01B	17.8	0
TCGA-CK-4948-01B	150.07	0
TCGA-CK-4950-01A	86.63	0
TCGA-CK-4951-01A	71.13	1
TCGA-CK-4952-01A	15.83	0
TCGA-CK-5912-01A	49.77	1
TCGA-CK-5913-01A	52.03	0
TCGA-CK-5914-01A	22.3	0
TCGA-CK-5916-01A	21.43	1
TCGA-CK-6747-01A	27.33	0
TCGA-CK-6748-01A	2.03	0
TCGA-CK-6751-01A	17.27	0
TCGA-CM-4743-01A	23.37	0
TCGA-CM-4744-01A	20.3	0
TCGA-CM-4746-01A	37.53	0
TCGA-CM-4747-01A	25.37	0
TCGA-CM-4748-01A	26.4	0
TCGA-CM-4750-01A	8.13	0
TCGA-CM-4751-01A	27.4	0
TCGA-CM-4752-01A	13.2	0
TCGA-CM-5341-01A	29.47	0
TCGA-CM-5344-01A	22.33	0
TCGA-CM-5348-01A	23.3	0
TCGA-CM-5349-01A	30.5	0
TCGA-CM-5860-01A	32.47	0
TCGA-CM-5861-01A	15.23	0
TCGA-CM-5862-01A	5.1	1
TCGA-CM-5863-01A	15.23	0
TCGA-CM-5864-01A	15.23	0
TCGA-CM-5868-01A	17.27	0
TCGA-CM-6161-01A	15.23	0
TCGA-CM-6162-01A	12.17	0
TCGA-CM-6163-01A	14.23	0
TCGA-CM-6164-01A	29.43	0
TCGA-CM-6165-01A	16.27	0
TCGA-CM-6166-01A	22.3	0
TCGA-CM-6167-01A	15.2	0
TCGA-CM-6168-01A	13.17	0
TCGA-CM-6169-01A	13.2	0
TCGA-CM-6170-01A	15.23	0
TCGA-CM-6171-01A	14.23	0
TCGA-CM-6172-01A	11.17	0
TCGA-CM-6674-01A	13.13	0
TCGA-CM-6675-01A	13.23	0
TCGA-CM-6676-01A	11.23	0
TCGA-CM-6677-01A	11.23	0
TCGA-CM-6678-01A	11.17	0
TCGA-CM-6679-01A	10.2	0
TCGA-CM-6680-01A	12.2	0
TCGA-D5-5537-01A	46.03	1
TCGA-D5-5538-01A	55.37	1
TCGA-D5-5539-01A	19.87	0
TCGA-D5-5540-01A	56.87	0
TCGA-D5-5541-01A	56.7	0
TCGA-D5-6529-01A	20.47	0
TCGA-D5-6530-01A	20.7	0
TCGA-D5-6531-01A	18	0
TCGA-D5-6532-01A	18.5	0
TCGA-D5-6533-01A	25.83	0
TCGA-D5-6534-01A	43.87	0
TCGA-D5-6535-01A	15.33	0
TCGA-D5-6536-01A	18.1	0
TCGA-D5-6537-01A	4.87	1
TCGA-D5-6538-01A	17.37	0
TCGA-D5-6539-01A	12.67	0
TCGA-D5-6540-01A	16.37	0
TCGA-D5-6541-01A	15.8	0
TCGA-D5-6898-01A	7.63	0
TCGA-D5-6920-01A	12.57	0
TCGA-D5-6922-01A	10.27	0
TCGA-D5-6923-01A	12.6	0
TCGA-D5-6924-01A	14.5	0
TCGA-D5-6926-01A	9.17	0
TCGA-D5-6927-01A	9.57	0
TCGA-D5-6928-01A	11.8	0
TCGA-D5-6929-01A	13.6	0
TCGA-D5-6930-01A	13.53	0
TCGA-D5-6931-01A	12.17	0
TCGA-D5-6932-01A	11.53	0
TCGA-D5-7000-01A	10.4	0
TCGA-DM-A0X9-01A	121.37	0
TCGA-DM-A0XD-01A	24.77	1
TCGA-DM-A0XF-01A	38.73	1
TCGA-DM-A1D0-01A	132.47	0
TCGA-DM-A1D4-01A	94.03	1
TCGA-DM-A1D6-01A	19	1
TCGA-DM-A1D7-01A	13.5	1
TCGA-DM-A1D8-01A	12.77	1
TCGA-DM-A1D9-01A	142.33	0
TCGA-DM-A1DA-01A	7.6	1
TCGA-DM-A1DB-01A	44.93	1
TCGA-DM-A1HA-01A	86.67	0
TCGA-DM-A1HB-01A	137.53	0
TCGA-DM-A280-01A	7.87	1
TCGA-DM-A282-01A	141.1	0
TCGA-DM-A285-01A	5.97	1
TCGA-DM-A288-01A	14.23	1
TCGA-DM-A28A-01A	26.83	1
TCGA-DM-A28C-01A	82.5	1
TCGA-DM-A28E-01A	121.6	0
TCGA-DM-A28F-01A	36.47	1
TCGA-DM-A28G-01A	61.63	1
TCGA-DM-A28H-01A	118.7	0
TCGA-DM-A28K-01A	99.6	0
TCGA-DM-A28M-01A	96.5	0
TCGA-F4-6459-01A	8.73	1
TCGA-F4-6460-01A	32.4	1
TCGA-F4-6461-01A	11.27	1
TCGA-F4-6463-01A	36.23	0
TCGA-F4-6569-01A	36.23	0
TCGA-F4-6570-01A	6.27	1
TCGA-F4-6703-01A	48.53	0
TCGA-F4-6704-01A	1.57	0
TCGA-F4-6805-01A	34.9	0
TCGA-F4-6806-01A	42	0
TCGA-F4-6807-01A	43.63	0
TCGA-F4-6808-01A	34.13	0
TCGA-F4-6809-01A	13.43	1
TCGA-F4-6855-01A	48.07	0
TCGA-F4-6856-01A	35.8	0
TCGA-G4-6293-01A	135.03	0
TCGA-G4-6294-01A	28.6	1
TCGA-G4-6295-01A	8.47	0
TCGA-G4-6297-01A	83.53	0
TCGA-G4-6299-01A	75.6	0
TCGA-G4-6303-01A	66.77	1
TCGA-G4-6304-01A	54.37	0
TCGA-G4-6306-01A	45.3	0
TCGA-G4-6307-01A	55.8	0
TCGA-G4-6309-01A	86.67	0
TCGA-G4-6310-01A	64.5	0
TCGA-G4-6311-01A	39.97	0
TCGA-G4-6314-01A	36.43	0
TCGA-G4-6315-01A	62.77	0
TCGA-G4-6317-01A	36.5	0
TCGA-G4-6317-02A	36.5	0
TCGA-G4-6320-01A	26.8	0
TCGA-G4-6321-01A	22.4	0
TCGA-G4-6322-01A	26.4	0
TCGA-G4-6323-01A	13.97	0
TCGA-G4-6586-01A	36.3	0
TCGA-G4-6588-01A	26.53	0
TCGA-G4-6625-01A	93.07	0
TCGA-G4-6627-01A	72.5	0
TCGA-G4-6628-01A	80.8	0
TCGA-NH-A50T-01A	18.43	0
TCGA-NH-A50U-01A	11.13	1
TCGA-NH-A50V-01A	19.6	0
TCGA-NH-A6GA-01A	10.07	1
TCGA-NH-A6GB-01A	15.87	0
TCGA-NH-A6GC-01A	12.97	0
TCGA-NH-A8F7-01A	18.1	0
TCGA-NH-A8F7-06A	18.1	0
TCGA-NH-A8F8-01A	17.03	1
TCGA-QG-A5YV-01A	43.37	0
TCGA-QG-A5YW-01A	29.87	0
TCGA-QG-A5YX-01A	33.43	0
TCGA-QG-A5Z1-01A	8.53	1
TCGA-QG-A5Z2-01A	31.73	0
TCGA-QL-A97D-01A	22.2	0
TCGA-RU-A8FL-01A	39.23	0
TCGA-SS-A7HO-01A	60.97	0
TCGA-T9-A92H-01A	12.07	0
TCGA-WS-AB45-01A	71	0
