# Supplementary material for: Tumor Microenvironment Heterogeneity-Based Score System Predicts Clinical Prognosis and Response to Immune Checkpoint Blockade in Multiple Colorectal Cancer Cohorts
Source: Front Mol Biosci. 2022 Jun 28;9:884839. doi: 10.3389/fmolb.2022.884839 (PMC9274205; doi:10.3389/fmolb.2022.884839)
Supplement: Supplementary file 12 [file Table4.xlsx]

## Sheet: CIBERSORT_results_15_immunecell
	GSM1681353	GSM1681354	GSM1681355	GSM1681356	GSM1681357	GSM1681358	GSM1681359	GSM1681360	GSM1681361	GSM1681362	GSM1681363	GSM1681364	GSM1681365	GSM1681366	GSM1681367	GSM1681368	GSM1681369	GSM1681370	GSM1681371	GSM1875897	GSM1875898	GSM1875899	GSM1875900	GSM1875901	GSM1875902	GSM1875903	GSM1875904	GSM1875905	GSM1875906	GSM1875907	GSM1875908	GSM1875909	GSM1875910	GSM1875911	GSM1875912	GSM1875913	GSM1875914	GSM1875915	GSM1875916	GSM1875917	GSM1875918	GSM1875919	GSM1875920	GSM1875921	GSM1875922	GSM1875923	GSM1875924	GSM1875925	GSM1875926
B cells naive	0.0426683	0.102877	0.0325848	0.0514597	0.173247	0.0856713	0.0761686	0.0059793	0.0130226	0.114432	0.055655	0.0263391	0.068457	0.0451513	0.0143548	0.0296018	0.0423532	0.137827	0.0316412	0	0	0	0	0.011927	0.0706279	0.0549404	0.0446526	0.0867053	0.0253789	0.0433683	0	0.00480614	0	0.0135454	0.00634948	0	0	0	0.0349386	0.00466443	0	0.0496804	0	0.0572699	0	0	0.0436679	0	0
Plasma cells	0.12019	0.136291	0.108811	0.114718	0.113391	0.116183	0.0918232	0.136869	0.119941	0.115987	0.140402	0.158191	0.183822	0.0968079	0.141597	0.095542	0.162195	0.0731988	0.182183	0.0782422	0.0810688	0.0947083	0.0673092	0.0525529	0.0805215	0.0829251	0.121958	0.146413	0.162013	0.0574438	0.0221235	0.0399725	0.0480872	0.111914	0.117662	0.0672325	0.0234418	0.0626376	0.185287	0.0248859	0.108278	0.163219	0.0483981	0.17666	0.0635664	0.128432	0.174486	0.0914216	0.101668
T cells CD8	0.209044	0.212792	0.0645237	0.10267	0.170062	0.119651	0.100787	0.125239	0.168022	0.0511912	0.0955895	0.126713	0.241497	0.11445	0.12294	0.139645	0.0408787	9.87e-05	0.111866	0	0.0790736	0.133395	0.139333	0.160947	0.00198502	0.33902	0.169184	0.0480595	0.123625	0.132718	0.0414982	0.04303	0.0131661	0.106359	0.0912777	0.0519488	0	0.0652105	0.133931	0.054496	0.0178964	0.0317592	0.0968966	0.0408031	0.0535974	0.0809165	0.15176	0.0134737	0.0771672
T cells CD4 memory resting	0.106266	0.0350951	0.179473	0.221292	0.126387	0.181845	0.165278	0.15203	0.109948	0.161138	0.127394	0.119511	0.000963489	0.157236	0.199294	0.140986	0.132784	0.214589	0.116454	0.0795793	0.0809699	0.14263	0.0463995	0	0.0683142	0	0.0571962	0.14112	0.120924	0.0434866	0.0369175	0.0653946	0.0265036	0	0	0.0435989	0.070676	0	0.104099	0.0362326	0.141033	0.205597	0.0464788	0.139389	0.0581741	0.114603	0	0.147544	0.103257
T cells CD4 memory activated	0	0	0	0	0	0	0	0	0	0	0	0	0	0	0.00211889	0	0	0.00391089	0	0	0	0	0.0669888	0	0.0490933	0.0495024	0.0172449	0.0352264	0.0311439	0.0235771	0.0266262	0	0	0	0.0274686	0	0	0.0124523	0.0032427	0	0.0645848	0.106003	0	0.083627	0	0.0586382	0	0	0
T cells follicular helper	0.0917024	0.117136	0.0437451	0.0601615	0.0640095	0.0707596	0.0671887	0.0800825	0.0621062	0.0482975	0.0780051	0.0606528	0.090051	0.059555	0.0721161	0.0759972	0.0250528	0.0646016	0.0592038	0.0878318	0	0.132821	0.106045	0.0705488	0.122589	0.123195	0.0659407	0.0453377	0.0444303	0.133779	0.0472483	0.0761815	0.0882321	0.0353913	0.0251035	0.0275679	0.0494516	0.0179259	0.0533874	0.0289765	0.0894463	0	0.0685941	0.022434	0.0377211	0.0506777	0.0817943	0.00541755	0.029454
T cells regulatory (Tregs)	0.00200455	0.0152251	0.0370651	0.011876	0.0191705	0	0	0	0.0756984	0.02653	0.0277929	0.0616236	0.0842489	0.00234091	0.0286885	0.024984	0.0192779	0	0.0164307	0.171315	0.110175	0.0322351	0.0497901	0.0654095	0.0506203	0.010861	0.0530819	0.00104634	0	0.0255794	0	0	0	0.0303763	0.0369934	0.0440129	0	0.0531266	0.0434444	0.0154621	0.0311633	0	0.00838921	0	0.0460808	0.0607128	0.0515314	0.0743994	0.0806368
NK cells resting	0	0.0671844	0.0370131	0.102115	0.0657585	0.0288256	0.0634597	0.0294708	0.0331603	0.0944607	0.0301753	0.0640338	0.0248497	0.0770134	0.0483072	0.0681008	0.0111252	0.00617034	0.0310906	0.155498	0.0870512	0.0171127	0.00599506	0	0.158541	0.0214775	0.0281753	0.0523406	0.041371	0	0.0576767	0.0068404	0	0	0	0.051327	0.066459	0.0639542	0.0244997	0.0612987	0.0677134	0.0639641	0	0.0773832	0.0453111	0.0864238	0	0	0
Macrophages M0	0	0.00771626	0	0	0.00448563	0	0	0.0320356	0	0.0375475	0.0121691	0	0	0	0	0	0	0	0	0.0706287	0	0.0328397	0.126394	0.256198	0.0678831	0.0253671	0.166561	0.10143	0.0978741	0.0973736	0.244424	0.241631	0.25307	0.421269	0.411413	0.199789	0.284535	0.184142	0.11605	0.260865	0.0926278	0.0754685	0.148383	0.0798881	0.136455	0.0276284	0.111869	0.146516	0.122852
Macrophages M1	0.0883439	0.025024	0.0225177	0.0265332	0.038197	0.0365377	0.0611724	0.0716155	0.0202291	0.0509402	0.0630677	0.0302917	0.0102456	0.034288	0.062005	0.070491	0.0220424	0.104083	0.0209432	0.0456506	0.0195663	0.00204686	0.0892555	0.0243186	0.030363	0.0418363	0.0773471	0.0560133	0.0361002	0.0734286	0.0713533	0.0758255	0.105023	0.0455703	0.0435743	0.0696096	0.047568	0.0428	0.0261277	0.0509072	0.0401921	0.0341862	0.0376922	0.0212002	0.0271371	0.0703384	0.0556696	0.0578012	0.0229591
Macrophages M2	0.151865	0.101545	0.155815	0.104895	0.133274	0.113119	0.141103	0.1661	0.127288	0.0954461	0.128838	0.133557	0.119329	0.235873	0.092941	0.114749	0.0623275	0.0930784	0.119829	0.0217918	0.0773243	0.128321	0.106919	0.214384	0.0461648	0.0680271	0.0872628	0.0949778	0.0956156	0.0696124	0.0958828	0.275616	0.334688	0.130796	0.145975	0.0130486	0.0727423	0.0541562	0.107684	0.0930704	0.134284	0.0845762	0.359076	0.0720368	0.0145751	0.119514	0.102745	0.0543868	0.0517791
Dendritic cells resting	0.0736163	0.0280468	0.145726	0.046654	0.0278467	0.127984	0.0998895	0.135153	0.18243	0.127477	0.115013	0.118794	0.0735248	0.0535072	0.108239	0.0860629	0.117082	0.014516	0.1218	0.0500667	0.0813303	0.0969511	0.091526	0.0434948	0.0211301	0.00794223	0.0247056	0.0707541	0.0823365	0.00582748	0.0208024	0.058288	0.0445094	0.0393459	0.0231736	0.0385742	0.0115398	0.0317965	0.0448861	0.0209151	0.0564267	0.0455607	0.0677461	0.0276038	0.0207957	0.0420361	0.0400677	0.107714	0.105539
Dendritic cells activated	0	0.0372393	0.0341701	0.00586758	0	0.00783709	0.0157542	0	0	0.0184403	0.00760526	0.00943138	0	0.0130166	0	0	0	0.0283512	0.0201804	0.0728276	0.0840706	0.0425885	0.00951351	0	0.0397132	0.0290032	0	0.00830489	0.0233305	0.0271824	0	0	0	0	0	0	0.000253199	4.24e-06	0.0225176	0	0.0125922	0.0187666	0	0.0364863	0.0438033	0	0	0.0208174	0.0369885
Mast cells activated	0.0306175	0.0815795	0.0918891	0.0913131	0.0284345	0.0192313	0.0662957	0.0530763	0.0768173	0.0505873	0.0340877	0.0589408	0.0326195	0.0461385	0.0459762	0.0448306	0.243713	0.0498704	0.0456927	0.0940344	0.221948	0.107893	0.0371484	0.0492645	0.168183	0.0594568	0.0866901	0.0845347	0.0543421	0.150048	0.215726	0.0418345	0.0131786	0.0328819	0.0130372	0.22526	0.244935	0.216172	0.0511441	0.260096	0.123618	0.0811578	0.0584641	0.116245	0.228984	0.0598741	0.0647608	0.0424641	0.0512883
Neutrophils	0	0.0196452	0.00949266	0.024919	0	0.000960063	0.0301236	0.0123493	0.00618327	0	0.0230419	0	0.00467029	0	0	0.00542961	0.106431	0	0.000117274	0.0181889	0.025615	0	0.027356	0.0376769	0.0242706	0	0	0.0259085	0.0576622	0.0971735	0.114464	0.0688248	0.0395073	0	0	0.102681	0.100742	0.120222	0	0.0881292	0.0093759	0.0316882	0.0373829	0.0489736	0.141816	0.025201	0	0.0460432	0.0259606
[truncated: 1,126 more columns]

## Sheet: cor_value_for_Fig 2E
	StromalScore	ImmuneScore	B cells naive	Plasma cells	T cells CD8	T cells CD4 memory resting	T cells CD4 memory activated	T cells follicular helper	T cells regulatory (Tregs)	NK cells resting	Macrophages M0	Macrophages M1	Macrophages M2	Dendritic cells resting	Dendritic cells activated	Mast cells activated	Neutrophils
StromalScore	1	0.721815	0.0393082	-0.216831	-0.141114	-0.0953132	-0.116926	-0.0728951	-0.303824	-0.365154	0.390053	0.227245	0.396399	-0.0826702	-0.256166	-0.147004	0.239813
ImmuneScore	0.721815	1	0.235807	-0.0563382	0.00334674	-0.0858555	0.0263837	0.0543514	-0.414737	-0.407451	0.129844	0.417358	0.161128	-0.0913303	-0.195977	-0.226869	0.250993
B cells naive	0.0393082	0.235807	1	0.32742	0.0117893	0.0869979	-0.0841781	0.0617297	-0.0970614	-0.138478	-0.168426	-0.0232362	-0.106075	-0.123411	-0.0520451	-0.132205	-0.128982
Plasma cells	-0.216831	-0.0563382	0.32742	1	0.0788106	0.16464	-0.121613	-0.0156683	0.0626311	-0.0183291	-0.368261	-0.224426	-0.129003	0.0397624	0.0111924	-0.171278	-0.238671
T cells CD8	-0.141114	0.00334674	0.0117893	0.0788106	1	-0.409567	0.0858078	0.255591	0.0772957	-0.17676	-0.306712	0.155617	-0.0278628	0.122899	-0.00159586	-0.252987	-0.253867
T cells CD4 memory resting	-0.0953132	-0.0858555	0.0869979	0.16464	-0.409567	1	-0.274987	-0.33714	-0.0808323	0.0454411	-0.197999	-0.289845	-0.0466658	0.0965291	0.101571	0.0829248	-0.0230315
T cells CD4 memory activated	-0.116926	0.0263837	-0.0841781	-0.121613	0.0858078	-0.274987	1	-0.0680235	-0.315896	0.27567	-0.128728	0.219009	-0.162923	-0.0035022	-0.0206739	-0.264441	-0.013536
T cells follicular helper	-0.0728951	0.0543514	0.0617297	-0.0156683	0.255591	-0.33714	-0.0680235	1	-0.0369504	-0.251967	-0.214062	0.371765	0.00164719	0.0246813	0.0610189	-0.180532	-0.168714
T cells regulatory (Tregs)	-0.303824	-0.414737	-0.0970614	0.0626311	0.0772957	-0.0808323	-0.315896	-0.0369504	1	0.0937708	-0.0729793	-0.207112	-0.0140939	0.0778966	-0.00961993	0.07241	-0.209763
NK cells resting	-0.365154	-0.407451	-0.138478	-0.0183291	-0.17676	0.0454411	0.27567	-0.251967	0.0937708	1	-0.0894688	-0.277961	-0.258586	-0.0817984	0.0971655	0.20697	-0.0807606
Macrophages M0	0.390053	0.129844	-0.168426	-0.368261	-0.306712	-0.197999	-0.128728	-0.214062	-0.0729793	-0.0894688	1	-0.102422	0.0579299	-0.379377	-0.229122	0.0882126	0.0870579
Macrophages M1	0.227245	0.417358	-0.0232362	-0.224426	0.155617	-0.289845	0.219009	0.371765	-0.207112	-0.277961	-0.102422	1	0.020047	0.0100375	-0.132372	-0.362639	0.0372344
Macrophages M2	0.396399	0.161128	-0.106075	-0.129003	-0.0278628	-0.0466658	-0.162923	0.00164719	-0.0140939	-0.258586	0.0579299	0.020047	1	0.083923	-0.134391	-0.322428	-0.0997184
Dendritic cells resting	-0.0826702	-0.0913303	-0.123411	0.0397624	0.122899	0.0965291	-0.0035022	0.0246813	0.0778966	-0.0817984	-0.379377	0.0100375	0.083923	1	-0.0176142	-0.22569	-0.0993765
Dendritic cells activated	-0.256166	-0.195977	-0.0520451	0.0111924	-0.00159586	0.101571	-0.0206739	0.0610189	-0.00961993	0.0971655	-0.229122	-0.132372	-0.134391	-0.0176142	1	0.0625776	0.0359821
Mast cells activated	-0.147004	-0.226869	-0.132205	-0.171278	-0.252987	0.0829248	-0.264441	-0.180532	0.07241	0.20697	0.0882126	-0.362639	-0.322428	-0.22569	0.0625776	1	0.311937
Neutrophils	0.239813	0.250993	-0.128982	-0.238671	-0.253867	-0.0230315	-0.013536	-0.168714	-0.209763	-0.0807606	0.0870579	0.0372344	-0.0997184	-0.0993765	0.0359821	0.311937	1

## Sheet: P_value_for_Fig 2E
	StromalScore	ImmuneScore	B cells naive	Plasma cells	T cells CD8	T cells CD4 memory resting	T cells CD4 memory activated	T cells follicular helper	T cells regulatory (Tregs)	NK cells resting	Macrophages M0	Macrophages M1	Macrophages M2	Dendritic cells resting	Dendritic cells activated	Mast cells activated	Neutrophils
StromalScore	0	1.03815e-189	0.17814	5.72448e-14	1.19598e-06	0.00107113	5.881e-05	0.0124409	1.628e-26	2.2458e-38	5.44292e-44	3.15392e-15	1.67886e-45	0.00457351	4.62737e-19	4.16621e-07	7.84637e-17
ImmuneScore	1.03815e-189	0	2.60749e-16	0.0535258	0.908763	0.00322656	0.366217	0.0625375	4.68138e-50	3.26825e-48	8.00714e-06	9.90561e-51	2.79803e-08	0.00172521	1.23182e-11	3.51114e-15	2.44452e-18
B cells naive	0.17814	2.60749e-16	0	9.23287e-31	0.686433	0.00283927	0.00388274	0.0343658	0.000864029	1.89124e-06	6.29368e-09	0.426174	0.000270023	2.21489e-05	0.0745334	5.4444e-06	9.20221e-06
Plasma cells	5.72448e-14	0.0535258	9.23287e-31	0	0.00687535	1.3761e-08	2.91797e-05	0.591583	0.0318165	0.530217	4.75553e-39	7.01275e-15	9.17202e-06	0.173174	0.701527	3.45075e-09	1.10743e-16
T cells CD8	1.19598e-06	0.908763	0.686433	0.00687535	0	9.62438e-49	0.00324373	5.57867e-19	0.00803227	1.05612e-09	5.15726e-27	8.26228e-08	0.339954	2.39683e-05	0.956421	1.29251e-18	9.73956e-19
T cells CD4 memory resting	0.00107113	0.00322656	0.00283927	1.3761e-08	9.62438e-49	0	7.86039e-22	1.26814e-32	0.00556482	0.11952	7.50306e-12	3.54795e-24	0.109867	0.000922781	0.000488463	0.00444961	0.430261
T cells CD4 memory activated	5.881e-05	0.366217	0.00388274	2.91797e-05	0.00324373	7.86039e-22	0	0.0197034	1.22145e-28	6.1759e-22	9.58666e-06	3.15944e-14	1.95047e-08	0.904545	0.478954	2.98338e-20	0.642992
T cells follicular helper	0.0124409	0.0625375	0.0343658	0.591583	5.57867e-19	1.26814e-32	0.0197034	0	0.205628	1.79179e-18	1.20726e-13	8.08997e-40	0.955021	0.397966	0.0364971	4.57573e-10	5.92629e-09
T cells regulatory (Tregs)	1.628e-26	4.68138e-50	0.000864029	0.0318165	0.00803227	0.00556482	1.22145e-28	0.205628	0	0.001291	0.0123396	7.51184e-13	0.629363	0.007554	0.741845	0.0130388	3.76919e-13
NK cells resting	2.2458e-38	3.26825e-48	1.89124e-06	0.530217	1.05612e-09	0.11952	6.1759e-22	1.79179e-18	0.001291	0	0.00214253	2.73736e-22	2.09678e-19	0.0050219	0.000852952	7.79413e-13	0.00560714
Macrophages M0	5.44292e-44	8.00714e-06	6.29368e-09	4.75553e-39	5.15726e-27	7.50306e-12	9.58666e-06	1.20726e-13	0.0123396	0.00214253	0	0.000437528	0.0471121	1.59805e-41	1.84161e-15	0.00247437	0.00282015
Macrophages M1	3.15392e-15	9.90561e-51	0.426174	7.01275e-15	8.26228e-08	3.54795e-24	3.15944e-14	8.08997e-40	7.51184e-13	2.73736e-22	0.000437528	0	0.49239	0.731063	5.29593e-06	7.79478e-38	0.202162
Macrophages M2	1.67886e-45	2.79803e-08	0.000270023	9.17202e-06	0.339954	0.109867	1.95047e-08	0.955021	0.629363	2.09678e-19	0.0471121	0.49239	0	0.00399249	3.78622e-06	7.86373e-30	0.000619177
Dendritic cells resting	0.00457351	0.00172521	2.21489e-05	0.173174	2.39683e-05	0.000922781	0.904545	0.397966	0.007554	0.0050219	1.59805e-41	0.731063	0.00399249	0	0.546384	4.90778e-15	0.000646596
Dendritic cells activated	4.62737e-19	1.23182e-11	0.0745334	0.701527	0.956421	0.000488463	0.478954	0.0364971	0.741845	0.000852952	1.84161e-15	5.29593e-06	3.78622e-06	0.546384	0	0.0319632	0.217766
Mast cells activated	4.16621e-07	3.51114e-15	5.4444e-06	3.45075e-09	1.29251e-18	0.00444961	2.98338e-20	4.57573e-10	0.0130388	7.79413e-13	0.00247437	7.79478e-38	7.86373e-30	4.90778e-15	0.0319632	0	6.23189e-28
Neutrophils	7.84637e-17	2.44452e-18	9.20221e-06	1.10743e-16	9.73956e-19	0.430261	0.642992	5.92629e-09	3.76919e-13	0.00560714	0.00282015	0.202162	0.000619177	0.000646596	0.217766	6.23189e-28	0
