# Supplementary material for: Tumor Microenvironment Heterogeneity-Based Score System Predicts Clinical Prognosis and Response to Immune Checkpoint Blockade in Multiple Colorectal Cancer Cohorts
Source: Front Mol Biosci. 2022 Jun 28;9:884839. doi: 10.3389/fmolb.2022.884839 (PMC9274205; doi:10.3389/fmolb.2022.884839)
Supplement: Supplementary file 18 [file Table8.xlsx]

## Sheet: TMEIG_score_GEO_combined
	sample	TMEIG_score	group
1	GSM1681353	32.1083	Low-Score
2	GSM1681354	33.8873	Low-Score
3	GSM1681355	30.9132	Low-Score
4	GSM1681356	33.9393	Low-Score
5	GSM1681357	30.6348	Low-Score
6	GSM1681359	35.8939	High-Score
7	GSM1681360	34.5235	High-Score
8	GSM1681361	29.9294	Low-Score
9	GSM1681362	31.042	Low-Score
10	GSM1681363	32.8524	Low-Score
11	GSM1681364	28.707	Low-Score
12	GSM1681365	31.1667	Low-Score
13	GSM1681367	32.3754	Low-Score
14	GSM1681368	30.1863	Low-Score
15	GSM1681369	35.1223	High-Score
16	GSM1681370	29.852	Low-Score
17	GSM1681371	31.838	Low-Score
18	GSM1875897	28.6028	Low-Score
19	GSM1875898	28.6178	Low-Score
20	GSM1875899	33.2323	Low-Score
21	GSM1875900	31.2841	Low-Score
22	GSM1875901	35.9804	High-Score
23	GSM1875902	28.2568	Low-Score
24	GSM1875903	33.1013	Low-Score
25	GSM1875904	30.6519	Low-Score
26	GSM1875905	28.2143	Low-Score
27	GSM1875906	27.8751	Low-Score
28	GSM1875907	26.479	Low-Score
29	GSM1875908	34.6009	High-Score
30	GSM1875909	33.2	Low-Score
31	GSM1875910	34.2372	High-Score
32	GSM1875911	37.4289	High-Score
33	GSM1875912	35.5487	High-Score
34	GSM1875913	29.5363	Low-Score
35	GSM1875914	35.0815	High-Score
36	GSM1875915	28.7788	Low-Score
37	GSM1875916	27.4138	Low-Score
38	GSM1875917	33.6854	Low-Score
39	GSM1875918	26.1958	Low-Score
40	GSM1875919	28.5126	Low-Score
41	GSM1875920	32.6238	Low-Score
42	GSM1875921	28.2143	Low-Score
43	GSM1875922	28.2619	Low-Score
44	GSM1875923	28.4072	Low-Score
45	GSM1875924	28.83	Low-Score
46	GSM1875925	28.5103	Low-Score
47	GSM1875926	28.5492	Low-Score
48	GSM1875927	28.5493	Low-Score
49	GSM1875928	28.4247	Low-Score
50	GSM1875929	28.1585	Low-Score
51	GSM1875930	29.0068	Low-Score
52	GSM1875931	29.6163	Low-Score
53	GSM1875932	29.3387	Low-Score
54	GSM1875933	28.7983	Low-Score
55	GSM1875934	28.546	Low-Score
56	GSM1875935	26.883	Low-Score
57	GSM1875936	28.6678	Low-Score
58	GSM1875937	31.4161	Low-Score
59	GSM1875938	27.6238	Low-Score
60	GSM1875939	28.9821	Low-Score
61	GSM1875940	28.6903	Low-Score
62	GSM1875941	27.8468	Low-Score
63	GSM1875942	34.2779	High-Score
64	GSM1875943	31.3049	Low-Score
65	GSM1875944	27.4506	Low-Score
66	GSM1875945	32.8786	Low-Score
67	GSM1875946	28.3961	Low-Score
68	GSM1875947	38.3043	High-Score
69	GSM1875948	35.77	High-Score
70	GSM1875949	38.9741	High-Score
71	GSM1875950	30.7963	Low-Score
72	GSM1875951	28.4524	Low-Score
73	GSM1875952	28.5425	Low-Score
74	GSM1875953	34.1534	High-Score
75	GSM1875954	33.8592	Low-Score
76	GSM1875955	34.3207	High-Score
77	GSM1875956	33.1731	Low-Score
78	GSM1875957	31.4733	Low-Score
79	GSM1875958	29.7695	Low-Score
80	GSM1875959	37.5892	High-Score
81	GSM1875960	26.9848	Low-Score
82	GSM1875961	25.4223	Low-Score
83	GSM1875962	29.0789	Low-Score
84	GSM1875963	33.6516	Low-Score
85	GSM1875964	37.9746	High-Score
86	GSM437093	30.2198	Low-Score
87	GSM437094	28.1466	Low-Score
88	GSM437095	27.732	Low-Score
89	GSM437096	26.583	Low-Score
90	GSM437097	27.2178	Low-Score
91	GSM437098	28.2723	Low-Score
92	GSM437099	26.2849	Low-Score
93	GSM437100	27.4383	Low-Score
94	GSM437101	25.3566	Low-Score
95	GSM437102	34.3606	High-Score
96	GSM437103	27.691	Low-Score
97	GSM437104	27.6931	Low-Score
98	GSM437105	31.5899	Low-Score
99	GSM437106	30.5248	Low-Score
100	GSM437107	27.2457	Low-Score
101	GSM437108	27.0905	Low-Score
102	GSM437109	28.2691	Low-Score
103	GSM437110	29.4007	Low-Score
104	GSM437111	31.7157	Low-Score
105	GSM437112	28.9141	Low-Score
106	GSM437113	27.9528	Low-Score
107	GSM437114	28.9003	Low-Score
108	GSM437115	30.0231	Low-Score
109	GSM437116	28.8883	Low-Score
110	GSM437117	29.2313	Low-Score
111	GSM437118	33.4473	Low-Score
112	GSM437119	39.944	High-Score
113	GSM437120	30.6214	Low-Score
114	GSM437121	34.828	High-Score
115	GSM437122	26.8004	Low-Score
116	GSM437123	30.1307	Low-Score
117	GSM437124	33.7344	Low-Score
118	GSM437125	33.7947	Low-Score
119	GSM437126	30.8388	Low-Score
120	GSM437127	32.6665	Low-Score
121	GSM437128	30.0092	Low-Score
122	GSM437129	26.4729	Low-Score
123	GSM437130	36.7986	High-Score
124	GSM437131	29.5249	Low-Score
125	GSM437132	26.8087	Low-Score
126	GSM437133	33.4073	Low-Score
127	GSM437134	32.0816	Low-Score
128	GSM437135	33.7997	Low-Score
129	GSM437136	29.6042	Low-Score
130	GSM437137	27.7433	Low-Score
131	GSM437138	30.7543	Low-Score
132	GSM437139	31.9282	Low-Score
133	GSM437140	26.5168	Low-Score
134	GSM437141	25.8639	Low-Score
135	GSM437142	30.4879	Low-Score
136	GSM437143	27.7433	Low-Score
137	GSM437144	31.6552	Low-Score
138	GSM437145	37.4809	High-Score
139	GSM437146	27.826	Low-Score
140	GSM437147	31.3681	Low-Score
141	GSM437148	29.3814	Low-Score
142	GSM437149	33.7626	Low-Score
143	GSM437150	29.7957	Low-Score
144	GSM437151	27.7163	Low-Score
145	GSM437152	29.1779	Low-Score
146	GSM437153	26.4855	Low-Score
147	GSM437154	29.5462	Low-Score
148	GSM437155	33.7599	Low-Score
149	GSM437156	33.7668	Low-Score
150	GSM437157	35.9195	High-Score
151	GSM437158	27.2559	Low-Score
152	GSM437159	29.8079	Low-Score
153	GSM437160	29.105	Low-Score
154	GSM437161	30.981	Low-Score
155	GSM437162	30.9473	Low-Score
156	GSM437163	30.7163	Low-Score
157	GSM437164	29.902	Low-Score
158	GSM437165	27.1267	Low-Score
159	GSM437166	29.8431	Low-Score
160	GSM437167	28.0897	Low-Score
161	GSM437168	26.1148	Low-Score
162	GSM437169	30.8125	Low-Score
163	GSM437170	27.8961	Low-Score
164	GSM437171	28.772	Low-Score
165	GSM437172	34.8411	High-Score
166	GSM437173	33.4522	Low-Score
167	GSM437174	37.4528	High-Score
168	GSM437175	31.4456	Low-Score
169	GSM437176	35.2834	High-Score
170	GSM437177	26.896	Low-Score
171	GSM437178	31.7724	Low-Score
172	GSM437179	28.3798	Low-Score
173	GSM437180	34.4627	High-Score
174	GSM437181	34.4153	High-Score
175	GSM437182	30.246	Low-Score
176	GSM437183	28.4058	Low-Score
177	GSM437184	37.5871	High-Score
178	GSM437185	28.0361	Low-Score
179	GSM437186	26.3237	Low-Score
180	GSM437187	31.5508	Low-Score
181	GSM437188	31.1142	Low-Score
182	GSM437189	34.2505	High-Score
183	GSM437190	35.0803	High-Score
184	GSM437191	30.419	Low-Score
185	GSM437192	27.7294	Low-Score
186	GSM437193	27.3333	Low-Score
187	GSM437194	29.0736	Low-Score
188	GSM437195	32.7096	Low-Score
189	GSM437196	30.7694	Low-Score
190	GSM437197	34.7985	High-Score
191	GSM437198	30.7828	Low-Score
192	GSM437199	33.1612	Low-Score
193	GSM437200	33.5097	Low-Score
194	GSM437201	39.4132	High-Score
195	GSM437202	31.9426	Low-Score
196	GSM437203	31.8655	Low-Score
197	GSM437204	37.4478	High-Score
198	GSM437205	28.6527	Low-Score
199	GSM437206	27.5236	Low-Score
200	GSM437207	27.5323	Low-Score
201	GSM437208	29.699	Low-Score
202	GSM437209	34.6401	High-Score
203	GSM437210	35.0497	High-Score
204	GSM437211	33.4163	Low-Score
205	GSM437212	34.5963	High-Score
206	GSM437213	27.1983	Low-Score
207	GSM437214	29.8724	Low-Score
208	GSM437215	31.2836	Low-Score
209	GSM437216	25.0323	Low-Score
210	GSM437217	28.8373	Low-Score
211	GSM437218	31.0023	Low-Score
212	GSM437219	27.6607	Low-Score
213	GSM437220	28.5063	Low-Score
214	GSM437221	26.1161	Low-Score
215	GSM437222	35.7739	High-Score
216	GSM437223	38.776	High-Score
217	GSM437225	33.9396	Low-Score
218	GSM437226	41.3476	High-Score
219	GSM437227	34.0863	High-Score
220	GSM437228	27.8868	Low-Score
221	GSM437229	31.9434	Low-Score
222	GSM437230	28.259	Low-Score
223	GSM437231	31.6181	Low-Score
224	GSM437232	28.5165	Low-Score
225	GSM437233	31.917	Low-Score
226	GSM437234	34.7011	High-Score
227	GSM437235	36.189	High-Score
228	GSM437236	29.4507	Low-Score
229	GSM437237	29.9781	Low-Score
230	GSM437238	27.6153	Low-Score
231	GSM437239	34.1365	High-Score
232	GSM437240	26.3609	Low-Score
233	GSM437241	33.899	Low-Score
234	GSM437243	37.091	High-Score
235	GSM437244	27.122	Low-Score
236	GSM437245	31.8841	Low-Score
237	GSM437246	30.0213	Low-Score
238	GSM437247	26.428	Low-Score
239	GSM437248	29.5284	Low-Score
240	GSM437249	29.3693	Low-Score
241	GSM437250	32.3031	Low-Score
242	GSM437251	30.3647	Low-Score
243	GSM437252	27.5651	Low-Score
244	GSM437253	31.4431	Low-Score
245	GSM437254	31.421	Low-Score
246	GSM437255	29.2085	Low-Score
247	GSM437256	28.0092	Low-Score
248	GSM437257	34.88	High-Score
249	GSM437258	28.243	Low-Score
250	GSM437259	29.0837	Low-Score
251	GSM437260	34.2419	High-Score
252	GSM437261	26.5547	Low-Score
253	GSM437262	33.9426	High-Score
254	GSM437263	38.3308	High-Score
255	GSM437264	27.7235	Low-Score
256	GSM437265	33.9985	High-Score
257	GSM437266	32.9852	Low-Score
258	GSM437267	40.6487	High-Score
259	GSM437268	25.9606	Low-Score
260	GSM437269	26.4751	Low-Score
261	GSM437270	27.6902	Low-Score
262	GSM437271	26.7952	Low-Score
263	GSM437272	31.1273	Low-Score
264	GSM437273	26.972	Low-Score
265	GSM437274	27.8898	Low-Score
266	GSM437275	26.6713	Low-Score
267	GSM437276	27.7251	Low-Score
268	GSM437277	27.7223	Low-Score
269	GSM437278	27.589	Low-Score
270	GSM437279	29.4576	Low-Score
271	GSM437280	27.3365	Low-Score
272	GSM437281	33.5565	Low-Score
273	GSM437282	28.7557	Low-Score
274	GSM437283	28.898	Low-Score
275	GSM437284	28.6273	Low-Score
276	GSM437285	28.4361	Low-Score
277	GSM437286	33.5289	Low-Score
278	GSM437287	28.7514	Low-Score
279	GSM437288	34.2039	High-Score
280	GSM437289	28.8906	Low-Score
281	GSM437290	27.6578	Low-Score
282	GSM437291	28.297	Low-Score
283	GSM437292	27.7609	Low-Score
284	GSM437293	36.7023	High-Score
285	GSM437294	35.277	High-Score
286	GSM437295	31.7017	Low-Score
287	GSM437296	28.6705	Low-Score
288	GSM437297	36.8178	High-Score
289	GSM437298	27.6864	Low-Score
290	GSM437299	30.0988	Low-Score
291	GSM437300	27.3554	Low-Score
292	GSM437301	40.0222	High-Score
293	GSM437302	29.7141	Low-Score
294	GSM437303	30.1969	Low-Score
295	GSM437304	33.1876	Low-Score
296	GSM437305	37.0838	High-Score
297	GSM437306	32.6702	Low-Score
298	GSM437307	32.0363	Low-Score
299	GSM437308	35.3588	High-Score
300	GSM437309	28.5331	Low-Score
301	GSM437310	27.3154	Low-Score
302	GSM437311	32.6313	Low-Score
303	GSM437312	28.2413	Low-Score
304	GSM437313	29.0831	Low-Score
305	GSM437314	30.9996	Low-Score
306	GSM437315	37.3997	High-Score
307	GSM437316	36.0756	High-Score
308	GSM437317	35.2828	High-Score
309	GSM437318	35.7276	High-Score
310	GSM437319	34.1326	High-Score
311	GSM437320	32.5978	Low-Score
312	GSM437321	28.6783	Low-Score
313	GSM437322	30.3788	Low-Score
314	GSM437324	28.0875	Low-Score
315	GSM971957	31.6943	Low-Score
316	GSM971958	34.8336	High-Score
317	GSM971959	31.5859	Low-Score
318	GSM971960	26.5296	Low-Score
319	GSM971961	36.8333	High-Score
320	GSM971962	35.2691	High-Score
321	GSM971963	34.9973	High-Score
322	GSM971964	28.7415	Low-Score
323	GSM971965	30.5068	Low-Score
324	GSM971966	36.4455	High-Score
325	GSM971967	32.6928	Low-Score
326	GSM971968	34.6862	High-Score
327	GSM971969	28.5125	Low-Score
328	GSM971970	34.5354	High-Score
329	GSM971971	29.9864	Low-Score
330	GSM971972	28.9592	Low-Score
331	GSM971973	30.2178	Low-Score
332	GSM971974	30.1241	Low-Score
333	GSM971975	26.9644	Low-Score
334	GSM971976	27.3792	Low-Score
335	GSM971977	36.7587	High-Score
336	GSM971978	29.4138	Low-Score
337	GSM971979	33.2565	Low-Score
338	GSM971980	35.6068	High-Score
339	GSM971981	31.3679	Low-Score
340	GSM971982	35.8514	High-Score
341	GSM971983	34.2518	High-Score
342	GSM971984	34.5145	High-Score
343	GSM971985	27.1899	Low-Score
344	GSM971986	32.2408	Low-Score
345	GSM971987	35.9845	High-Score
346	GSM971988	35.0336	High-Score
347	GSM971989	32.0786	Low-Score
348	GSM971990	28.0098	Low-Score
349	GSM971991	29.8195	Low-Score
350	GSM971992	25.7048	Low-Score
351	GSM971993	28.7447	Low-Score
352	GSM971994	33.6367	Low-Score
353	GSM971995	27.8081	Low-Score
354	GSM971996	38.9527	High-Score
355	GSM971997	33.9448	High-Score
356	GSM971998	30.852	Low-Score
357	GSM972000	28.3937	Low-Score
358	GSM972001	27.1661	Low-Score
359	GSM972002	29.3308	Low-Score
360	GSM972003	29.751	Low-Score
361	GSM972004	29.8356	Low-Score
362	GSM972005	26.5425	Low-Score
363	GSM972006	30.1706	Low-Score
364	GSM972007	35.4008	High-Score
365	GSM972008	40.3581	High-Score
366	GSM972009	34.9227	High-Score
367	GSM972010	30.2109	Low-Score
368	GSM972011	39.2362	High-Score
369	GSM972012	26.853	Low-Score
370	GSM972013	29.7154	Low-Score
371	GSM972014	28.0023	Low-Score
372	GSM972015	35.1043	High-Score
373	GSM972016	30.4738	Low-Score
374	GSM972017	31.8858	Low-Score
375	GSM972018	28.3839	Low-Score
376	GSM972019	38.4278	High-Score
377	GSM972020	32.2055	Low-Score
378	GSM972021	32.0003	Low-Score
379	GSM972022	33.5069	Low-Score
380	GSM972023	32.1191	Low-Score
381	GSM972024	27.5491	Low-Score
382	GSM972025	27.1814	Low-Score
383	GSM972026	35.1289	High-Score
384	GSM972027	30.2006	Low-Score
385	GSM972028	31.0513	Low-Score
386	GSM972029	30.3386	Low-Score
387	GSM972030	37.2581	High-Score
388	GSM972031	28.7668	Low-Score
389	GSM972032	30.782	Low-Score
390	GSM972033	31.2153	Low-Score
391	GSM972034	30.9742	Low-Score
392	GSM972035	26.3385	Low-Score
393	GSM972036	30.2275	Low-Score
394	GSM972037	27.5746	Low-Score
395	GSM972039	38.9131	High-Score
396	GSM972040	29.3082	Low-Score
397	GSM972041	34.3082	High-Score
398	GSM972042	26.4681	Low-Score
399	GSM972043	27.7263	Low-Score
400	GSM972044	28.7586	Low-Score
401	GSM972045	30.4971	Low-Score
402	GSM972046	30.7522	Low-Score
403	GSM972047	35.8221	High-Score
404	GSM972048	28.2239	Low-Score
405	GSM972049	28.6165	Low-Score
406	GSM972050	26.9532	Low-Score
407	GSM972051	37.3034	High-Score
408	GSM972052	29.0029	Low-Score
409	GSM972053	28.8344	Low-Score
410	GSM972054	34.9629	High-Score
411	GSM972055	34.8298	High-Score
412	GSM972056	33.6547	Low-Score
413	GSM972057	28.1652	Low-Score
414	GSM972058	36.039	High-Score
415	GSM972059	36.7943	High-Score
416	GSM972060	28.3254	Low-Score
417	GSM972061	33.1894	Low-Score
418	GSM972062	28.2537	Low-Score
419	GSM972063	29.3031	Low-Score
420	GSM972064	39.0442	High-Score
421	GSM972065	29.4824	Low-Score
422	GSM972066	30.0144	Low-Score
423	GSM972067	32.5634	Low-Score
424	GSM972068	37.6111	High-Score
425	GSM972069	30.4211	Low-Score
426	GSM972070	29.6423	Low-Score
427	GSM972071	27.9992	Low-Score
428	GSM972072	40.8232	High-Score
429	GSM972073	33.6833	Low-Score
430	GSM972074	27.4214	Low-Score
431	GSM972075	28.1749	Low-Score
432	GSM972076	30.1036	Low-Score
433	GSM972077	32.4693	Low-Score
434	GSM972078	30.3944	Low-Score
435	GSM972079	34.6192	High-Score
436	GSM972080	30.5273	Low-Score
437	GSM972081	29.0028	Low-Score
438	GSM972082	37.0468	High-Score
439	GSM972083	27.6288	Low-Score
440	GSM972084	32.6027	Low-Score
441	GSM972085	28.4297	Low-Score
442	GSM972086	30.9788	Low-Score
443	GSM972087	28.161	Low-Score
444	GSM972088	37.6229	High-Score
445	GSM972089	41.7478	High-Score
446	GSM972090	27.5906	Low-Score
447	GSM972091	27.3932	Low-Score
448	GSM972092	32.305	Low-Score
449	GSM972093	36.3508	High-Score
450	GSM972094	33.5428	Low-Score
451	GSM972095	31.1817	Low-Score
452	GSM972096	26.9396	Low-Score
453	GSM972097	36.125	High-Score
454	GSM972098	27.5975	Low-Score
455	GSM972099	26.5204	Low-Score
456	GSM972100	31.4772	Low-Score
457	GSM972101	28.4294	Low-Score
458	GSM972102	34.3799	High-Score
459	GSM972103	30.8169	Low-Score
460	GSM972104	36.6441	High-Score
461	GSM972105	28.522	Low-Score
462	GSM972106	28.1981	Low-Score
463	GSM972107	31.3544	Low-Score
464	GSM972108	26.7148	Low-Score
465	GSM972109	30.77	Low-Score
466	GSM972110	30.0792	Low-Score
467	GSM972111	31.5573	Low-Score
468	GSM972112	40.7074	High-Score
469	GSM972113	40.653	High-Score
470	GSM972114	32.0004	Low-Score
471	GSM972115	29.0621	Low-Score
472	GSM972116	32.5413	Low-Score
473	GSM972117	33.2062	Low-Score
474	GSM972118	27.0345	Low-Score
475	GSM972119	29.5214	Low-Score
476	GSM972120	30.1793	Low-Score
477	GSM972121	27.0888	Low-Score
478	GSM972122	28.6293	Low-Score
479	GSM972123	28.004	Low-Score
480	GSM972124	29.6087	Low-Score
481	GSM972125	31.5865	Low-Score
482	GSM972126	26.8785	Low-Score
483	GSM972127	31.3179	Low-Score
484	GSM972128	33.1221	Low-Score
485	GSM972129	29.1331	Low-Score
486	GSM972130	25.8202	Low-Score
487	GSM972131	41.4991	High-Score
488	GSM972132	30.3443	Low-Score
489	GSM972133	31.9282	Low-Score
490	GSM972134	31.3902	Low-Score
491	GSM972135	26.9919	Low-Score
492	GSM972136	30.1547	Low-Score
493	GSM972137	27.9812	Low-Score
494	GSM972138	26.1311	Low-Score
495	GSM972139	27.5821	Low-Score
496	GSM972140	33.5671	Low-Score
497	GSM972141	30.1971	Low-Score
498	GSM972142	28.0074	Low-Score
499	GSM972143	29.7276	Low-Score
500	GSM972144	26.1003	Low-Score
501	GSM972145	29.0844	Low-Score
502	GSM972146	33.0055	Low-Score
503	GSM972147	27.9632	Low-Score
504	GSM972148	29.1346	Low-Score
505	GSM972149	28.5521	Low-Score
506	GSM972150	27.5005	Low-Score
507	GSM972151	25.912	Low-Score
508	GSM972152	27.704	Low-Score
509	GSM972153	29.2004	Low-Score
510	GSM972154	28.1098	Low-Score
511	GSM972155	28.8826	Low-Score
512	GSM972156	29.0364	Low-Score
513	GSM972157	31.6919	Low-Score
514	GSM972158	36.8692	High-Score
515	GSM972159	31.3963	Low-Score
516	GSM972160	27.387	Low-Score
517	GSM972161	29.9863	Low-Score
518	GSM972162	31.6841	Low-Score
519	GSM972163	31.0434	Low-Score
520	GSM972164	30.2899	Low-Score
521	GSM972165	31.6581	Low-Score
522	GSM972166	31.1552	Low-Score
523	GSM972167	27.0266	Low-Score
524	GSM972168	33.0134	Low-Score
525	GSM972169	29.1723	Low-Score
526	GSM972170	28.6523	Low-Score
527	GSM972171	37.497	High-Score
528	GSM972172	30.2014	Low-Score
529	GSM972173	29.3663	Low-Score
530	GSM972174	29.3236	Low-Score
531	GSM972175	29.9356	Low-Score
532	GSM972176	38.1126	High-Score
533	GSM972177	28.7984	Low-Score
534	GSM972178	30.933	Low-Score
535	GSM972179	29.2273	Low-Score
536	GSM972180	35.526	High-Score
537	GSM972181	38.0295	High-Score
538	GSM972182	30.0017	Low-Score
539	GSM972183	27.0202	Low-Score
540	GSM972184	42.6047	High-Score
541	GSM972185	28.9334	Low-Score
542	GSM972186	40.2219	High-Score
543	GSM972187	36.0345	High-Score
544	GSM972188	27.8082	Low-Score
545	GSM972189	27.5692	Low-Score
546	GSM972190	28.1847	Low-Score
547	GSM972191	28.0885	Low-Score
548	GSM972192	32.0294	Low-Score
549	GSM972193	28.8643	Low-Score
550	GSM972194	28.2332	Low-Score
551	GSM972195	28.1614	Low-Score
552	GSM972196	33.1048	Low-Score
553	GSM972197	32.5722	Low-Score
554	GSM972198	27.8424	Low-Score
555	GSM972199	32.9518	Low-Score
556	GSM972200	28.9773	Low-Score
557	GSM972201	37.6138	High-Score
558	GSM972202	28.3608	Low-Score
559	GSM972203	29.5679	Low-Score
560	GSM972204	29.5443	Low-Score
561	GSM972205	28.5911	Low-Score
562	GSM972206	32.6463	Low-Score
563	GSM972207	28.9669	Low-Score
564	GSM972208	34.0254	High-Score
565	GSM972209	34.2079	High-Score
566	GSM972210	31.4551	Low-Score
567	GSM972211	30.3805	Low-Score
568	GSM972212	28.9968	Low-Score
569	GSM972214	34.0528	High-Score
570	GSM972215	30.7811	Low-Score
571	GSM972216	32.5299	Low-Score
572	GSM972217	29.6411	Low-Score
573	GSM972218	29.3411	Low-Score
574	GSM972219	30.7822	Low-Score
575	GSM972221	28.6467	Low-Score
576	GSM972222	28.9468	Low-Score
577	GSM972223	31.6455	Low-Score
578	GSM972224	33.7462	Low-Score
579	GSM972225	28.8844	Low-Score
580	GSM972226	32.2713	Low-Score
581	GSM972227	26.7944	Low-Score
582	GSM972230	28.8724	Low-Score
583	GSM972231	30.4579	Low-Score
584	GSM972232	32.4767	Low-Score
585	GSM972233	28.9923	Low-Score
586	GSM972234	31.8207	Low-Score
587	GSM972235	27.3274	Low-Score
588	GSM972236	27.5328	Low-Score
589	GSM972237	27.4808	Low-Score
590	GSM972238	28.6626	Low-Score
591	GSM972239	28.2982	Low-Score
592	GSM972240	30.406	Low-Score
593	GSM972241	29.5803	Low-Score
594	GSM972242	29.8344	Low-Score
595	GSM972243	28.4712	Low-Score
596	GSM972244	27.9339	Low-Score
597	GSM972247	27.8117	Low-Score
598	GSM972248	28.4674	Low-Score
599	GSM972249	27.9687	Low-Score
600	GSM972250	27.2224	Low-Score
601	GSM972251	35.9963	High-Score
602	GSM972252	27.475	Low-Score
603	GSM972253	27.6591	Low-Score
604	GSM972254	33.2499	Low-Score
605	GSM972255	33.8624	Low-Score
606	GSM972256	29.1673	Low-Score
607	GSM972257	28.2136	Low-Score
608	GSM972259	28.8979	Low-Score
609	GSM972260	29.1412	Low-Score
610	GSM972261	32.5573	Low-Score
611	GSM972262	35.9923	High-Score
612	GSM972263	28.1323	Low-Score
613	GSM972264	27.5937	Low-Score
614	GSM972265	33.3949	Low-Score
615	GSM972266	28.6776	Low-Score
616	GSM972267	28.0023	Low-Score
617	GSM972268	27.7602	Low-Score
618	GSM972269	28.364	Low-Score
619	GSM972270	31.4566	Low-Score
620	GSM972271	28.0279	Low-Score
621	GSM972272	27.5441	Low-Score
622	GSM972273	27.7281	Low-Score
623	GSM972274	36.8923	High-Score
624	GSM972275	37.327	High-Score
625	GSM972276	30.2496	Low-Score
626	GSM972277	31.8847	Low-Score
627	GSM972278	31.43	Low-Score
628	GSM972279	33.9083	Low-Score
629	GSM972280	32.2858	Low-Score
630	GSM972281	28.4827	Low-Score
631	GSM972282	27.9592	Low-Score
632	GSM972283	33.9425	Low-Score
633	GSM972284	27.7896	Low-Score
634	GSM972285	27.2302	Low-Score
635	GSM972286	31.6533	Low-Score
636	GSM972287	34.8215	High-Score
637	GSM972288	28.6028	Low-Score
638	GSM972289	26.5617	Low-Score
639	GSM972290	29.8966	Low-Score
640	GSM972291	30.3539	Low-Score
641	GSM972292	35.459	High-Score
642	GSM972293	33.4475	Low-Score
643	GSM972294	36.3278	High-Score
644	GSM972295	29.1077	Low-Score
645	GSM972296	26.1187	Low-Score
646	GSM972297	33.3392	Low-Score
647	GSM972298	31.6804	Low-Score
648	GSM972299	28.2887	Low-Score
649	GSM972300	27.9652	Low-Score
650	GSM972301	30.5378	Low-Score
651	GSM972302	28.017	Low-Score
652	GSM972303	26.4651	Low-Score
653	GSM972304	26.9611	Low-Score
654	GSM972305	31.7078	Low-Score
655	GSM972306	28.0873	Low-Score
656	GSM972307	27.0048	Low-Score
657	GSM972308	31.3762	Low-Score
658	GSM972309	27.305	Low-Score
659	GSM972310	30.8038	Low-Score
660	GSM972311	28.9993	Low-Score
661	GSM972312	29.3394	Low-Score
662	GSM972313	28.7807	Low-Score
663	GSM972314	26.9242	Low-Score
664	GSM972315	25.9437	Low-Score
665	GSM972316	32.4602	Low-Score
666	GSM972317	33.3053	Low-Score
667	GSM972318	30.422	Low-Score
668	GSM972319	25.1877	Low-Score
669	GSM972320	27.8133	Low-Score
670	GSM972321	30.236	Low-Score
671	GSM972322	27.9972	Low-Score
672	GSM972323	25.8825	Low-Score
673	GSM972324	27.6565	Low-Score
674	GSM972325	30.7867	Low-Score
675	GSM972326	26.7268	Low-Score
676	GSM972327	30.4711	Low-Score
677	GSM972328	28.3424	Low-Score
678	GSM972329	28.9009	Low-Score
679	GSM972330	31.9111	Low-Score
680	GSM972331	27.5013	Low-Score
681	GSM972332	33.9973	High-Score
682	GSM972333	28.3149	Low-Score
683	GSM972334	34.3782	High-Score
684	GSM972335	27.8392	Low-Score
685	GSM972336	26.8517	Low-Score
686	GSM972337	30.7768	Low-Score
687	GSM972338	27.9355	Low-Score
688	GSM972339	26.9327	Low-Score
689	GSM972340	27.6882	Low-Score
690	GSM972341	26.785	Low-Score
691	GSM972342	29.4778	Low-Score
692	GSM972343	28.2225	Low-Score
693	GSM972344	29.0558	Low-Score
694	GSM972345	33.4069	Low-Score
695	GSM972346	32.8532	Low-Score
696	GSM972347	28.264	Low-Score
697	GSM972348	25.7819	Low-Score
698	GSM972349	40.2234	High-Score
699	GSM972350	25.8381	Low-Score
700	GSM972351	31.7623	Low-Score
701	GSM972352	31.848	Low-Score
702	GSM972353	33.6141	Low-Score
703	GSM972354	31.5583	Low-Score
704	GSM972355	34.2663	High-Score
705	GSM972356	27.0434	Low-Score
706	GSM972357	30.9016	Low-Score
707	GSM972358	26.8768	Low-Score
708	GSM972359	38.312	High-Score
709	GSM972360	27.8014	Low-Score
710	GSM972361	40.1251	High-Score
711	GSM972362	28.3333	Low-Score
712	GSM972363	28.1407	Low-Score
713	GSM972364	29.4267	Low-Score
714	GSM972365	36.5462	High-Score
715	GSM972366	35.0574	High-Score
716	GSM972367	34.1856	High-Score
717	GSM972368	26.5588	Low-Score
718	GSM972369	29.2615	Low-Score
719	GSM972370	27.0209	Low-Score
720	GSM972371	31.8622	Low-Score
721	GSM972372	31.5952	Low-Score
722	GSM972373	26.6526	Low-Score
723	GSM972374	26.8109	Low-Score
724	GSM972375	31.8809	Low-Score
725	GSM972376	30.6392	Low-Score
726	GSM972377	30.7347	Low-Score
727	GSM972378	32.3016	Low-Score
728	GSM972379	25.3905	Low-Score
729	GSM972380	34.1031	High-Score
730	GSM972381	28.2513	Low-Score
731	GSM972382	29.7558	Low-Score
732	GSM972383	26.2025	Low-Score
733	GSM972384	31.1513	Low-Score
734	GSM972385	32.811	Low-Score
735	GSM972386	29.1234	Low-Score
736	GSM972387	26.335	Low-Score
737	GSM972388	27.5769	Low-Score
738	GSM972389	26.5278	Low-Score
739	GSM972390	34.6677	High-Score
740	GSM972391	32.8435	Low-Score
741	GSM972392	29.1286	Low-Score
742	GSM972393	28.6955	Low-Score
743	GSM972394	31.547	Low-Score
744	GSM972395	29.4227	Low-Score
745	GSM972396	26.9179	Low-Score
746	GSM972397	28.2819	Low-Score
747	GSM972398	28.6773	Low-Score
748	GSM972399	27.6496	Low-Score
749	GSM972400	30.016	Low-Score
750	GSM972402	38.9225	High-Score
751	GSM972403	32.817	Low-Score
752	GSM972404	30.6072	Low-Score
753	GSM972405	30.3873	Low-Score
754	GSM972406	31.6916	Low-Score
755	GSM972407	31.002	Low-Score
756	GSM972408	31.2241	Low-Score
757	GSM972409	33.5322	Low-Score
758	GSM972410	33.0984	Low-Score
759	GSM972411	27.3529	Low-Score
760	GSM972412	42.6425	High-Score
761	GSM972413	39.12	High-Score
762	GSM972414	27.5094	Low-Score
763	GSM972415	28.9788	Low-Score
764	GSM972416	34.8955	High-Score
765	GSM972417	30.3735	Low-Score
766	GSM972418	29.3995	Low-Score
767	GSM972419	31.7498	Low-Score
768	GSM972420	37.0397	High-Score
769	GSM972421	34.9077	High-Score
770	GSM972422	40.8662	High-Score
771	GSM972423	29.0753	Low-Score
772	GSM972424	28.6369	Low-Score
773	GSM972425	38.7244	High-Score
774	GSM972426	32.6952	Low-Score
775	GSM972427	30.717	Low-Score
776	GSM972428	34.4321	High-Score
777	GSM972429	32.8497	Low-Score
778	GSM972430	32.0392	Low-Score
779	GSM972431	33.5137	Low-Score
780	GSM972432	32.9643	Low-Score
781	GSM972433	39.7612	High-Score
782	GSM972434	27.8158	Low-Score
783	GSM972435	29.3549	Low-Score
784	GSM972436	32.2267	Low-Score
785	GSM972437	33.776	Low-Score
786	GSM972438	38.2666	High-Score
787	GSM972439	30.7232	Low-Score
788	GSM972440	36.5507	High-Score
789	GSM972441	36.8883	High-Score
790	GSM972442	29.8039	Low-Score
791	GSM972443	29.9164	Low-Score
792	GSM972444	37.7985	High-Score
793	GSM972445	30.1538	Low-Score
794	GSM972447	34.1562	High-Score
795	GSM972449	30.2448	Low-Score
796	GSM972450	25.9312	Low-Score
797	GSM972451	28.311	Low-Score
798	GSM972452	31.6566	Low-Score
799	GSM972453	27.6277	Low-Score
800	GSM972454	28.9724	Low-Score
801	GSM972455	35.7712	High-Score
802	GSM972457	27.1658	Low-Score
803	GSM972458	33.9772	High-Score
804	GSM972459	32.952	Low-Score
805	GSM972460	32.331	Low-Score
806	GSM972461	26.5896	Low-Score
807	GSM972462	26.8105	Low-Score
808	GSM972463	28.3553	Low-Score
809	GSM972464	31.4526	Low-Score
810	GSM972465	32.0749	Low-Score
811	GSM972466	29.3643	Low-Score
812	GSM972467	33.6466	Low-Score
813	GSM972468	28.6481	Low-Score
814	GSM972469	26.942	Low-Score
815	GSM972470	32.9029	Low-Score
816	GSM972472	29.3755	Low-Score
817	GSM972473	28.3311	Low-Score
818	GSM972474	30.4553	Low-Score
819	GSM972475	26.7907	Low-Score
820	GSM972476	34.2018	High-Score
821	GSM972477	29.9843	Low-Score
822	GSM972478	26.9673	Low-Score
823	GSM972479	37.9844	High-Score
824	GSM972480	27.1126	Low-Score
825	GSM972481	28.5068	Low-Score
826	GSM972482	29.041	Low-Score
827	GSM972483	27.0729	Low-Score
828	GSM972484	29.2894	Low-Score
829	GSM972485	30.0289	Low-Score
830	GSM972486	34.4076	High-Score
831	GSM972487	26.4038	Low-Score
832	GSM972488	27.3189	Low-Score
833	GSM972489	28.4617	Low-Score
834	GSM972490	26.8308	Low-Score
835	GSM972491	28.4238	Low-Score
836	GSM972492	28.991	Low-Score
837	GSM972493	29.7451	Low-Score
838	GSM972494	25.6832	Low-Score
839	GSM972495	32.1811	Low-Score
840	GSM972496	27.9599	Low-Score
841	GSM972498	29.6284	Low-Score
842	GSM972499	33.492	Low-Score
843	GSM972501	27.1222	Low-Score
844	GSM972502	27.0808	Low-Score
845	GSM972503	33.326	Low-Score
846	GSM972504	30.8823	Low-Score
847	GSM972505	28.0846	Low-Score
848	GSM972506	31.1384	Low-Score
849	GSM972507	28.4919	Low-Score
850	GSM972508	26.5728	Low-Score
851	GSM972509	27.2815	Low-Score
852	GSM972510	25.8415	Low-Score
853	GSM972511	27.9036	Low-Score
854	GSM972512	30.0165	Low-Score
855	GSM972513	29.4555	Low-Score
856	GSM972514	27.1142	Low-Score
857	GSM972515	27.3275	Low-Score
858	GSM972516	27.1097	Low-Score
859	GSM972517	29.5936	Low-Score
860	GSM972518	30.4968	Low-Score
861	GSM972519	29.8068	Low-Score
862	GSM972520	32.5479	Low-Score
863	GSM972521	31.4992	Low-Score
864	GSM972522	30.0229	Low-Score

## Sheet: TMEIG_score_TCGA_COAD
	barcode	TMEIG_score	group
1	TCGA-3L-AA1B-01A	Low-Score	34.3195
2	TCGA-4N-A93T-01A	Low-Score	13.486
3	TCGA-4T-AA8H-01A	Low-Score	12.1214
4	TCGA-5M-AAT4-01A	Low-Score	60.723
5	TCGA-5M-AAT6-01A	High-Score	335.075
6	TCGA-5M-AATE-01A	Low-Score	27.0323
7	TCGA-A6-2671-01A	High-Score	184.946
8	TCGA-A6-2672-01A	High-Score	126.273
9	TCGA-A6-2672-01B	High-Score	83.4066
10	TCGA-A6-2674-01A	High-Score	231.647
11	TCGA-A6-2674-01B	High-Score	165.166
12	TCGA-A6-2675-01A	High-Score	90.0089
13	TCGA-A6-2676-01A	High-Score	144.975
14	TCGA-A6-2677-01A	Low-Score	49.2696
15	TCGA-A6-2677-01B	Low-Score	39.2926
16	TCGA-A6-2678-01A	Low-Score	19.8903
17	TCGA-A6-2679-01A	Low-Score	37.9125
18	TCGA-A6-2680-01A	Low-Score	52.1981
19	TCGA-A6-2681-01A	High-Score	108.578
20	TCGA-A6-2682-01A	High-Score	169.26
21	TCGA-A6-2683-01A	Low-Score	6.48634
22	TCGA-A6-2684-01A	Low-Score	49.0553
23	TCGA-A6-2684-01C	Low-Score	51.5523
24	TCGA-A6-2685-01A	High-Score	243.48
25	TCGA-A6-2686-01A	Low-Score	50.0684
26	TCGA-A6-3807-01A	Low-Score	64.2886
27	TCGA-A6-3808-01A	High-Score	128.307
28	TCGA-A6-3809-01A	Low-Score	28.397
29	TCGA-A6-3809-01B	Low-Score	13.8831
30	TCGA-A6-3810-01A	High-Score	111.64
31	TCGA-A6-3810-01B	Low-Score	40.5743
32	TCGA-A6-4105-01A	High-Score	85.5077
33	TCGA-A6-4107-01A	Low-Score	21.0621
34	TCGA-A6-5656-01A	Low-Score	30.4677
35	TCGA-A6-5656-01B	Low-Score	56.5532
36	TCGA-A6-5657-01A	High-Score	214.166
37	TCGA-A6-5659-01A	Low-Score	36.4586
38	TCGA-A6-5659-01B	Low-Score	7.74682
39	TCGA-A6-5660-01A	Low-Score	49.7135
40	TCGA-A6-5661-01A	Low-Score	41.6051
41	TCGA-A6-5661-01B	Low-Score	29.9307
42	TCGA-A6-5662-01A	Low-Score	36.0526
43	TCGA-A6-5664-01A	High-Score	171.118
44	TCGA-A6-5665-01A	Low-Score	46.3222
45	TCGA-A6-5665-01B	High-Score	170.005
46	TCGA-A6-5666-01A	Low-Score	11.0775
47	TCGA-A6-5667-01A	Low-Score	35.7827
48	TCGA-A6-6137-01A	Low-Score	55.477
49	TCGA-A6-6138-01A	Low-Score	45.8764
50	TCGA-A6-6140-01A	Low-Score	23.4752
51	TCGA-A6-6141-01A	Low-Score	8.48372
52	TCGA-A6-6142-01A	High-Score	164.756
53	TCGA-A6-6648-01A	Low-Score	24.2909
54	TCGA-A6-6649-01A	High-Score	95.0449
55	TCGA-A6-6650-01A	Low-Score	17.9642
56	TCGA-A6-6650-01B	Low-Score	22.2883
57	TCGA-A6-6651-01A	High-Score	225.197
58	TCGA-A6-6652-01A	Low-Score	39.0963
59	TCGA-A6-6653-01A	Low-Score	54.5255
60	TCGA-A6-6654-01A	High-Score	178.084
61	TCGA-A6-6780-01A	Low-Score	23.286
62	TCGA-A6-6780-01B	Low-Score	40.4872
63	TCGA-A6-6781-01A	High-Score	384.737
64	TCGA-A6-6781-01B	High-Score	220.614
65	TCGA-A6-6782-01A	High-Score	279.384
66	TCGA-A6-A565-01A	High-Score	297.736
67	TCGA-A6-A566-01A	High-Score	271.059
68	TCGA-A6-A567-01A	High-Score	67.9563
69	TCGA-A6-A56B-01A	Low-Score	44.9228
70	TCGA-A6-A5ZU-01A	Low-Score	39.682
71	TCGA-AA-3488-01A	Low-Score	19.7111
72	TCGA-AA-3489-01A	High-Score	484.883
73	TCGA-AA-3494-01A	Low-Score	15.4596
74	TCGA-AA-3495-01A	Low-Score	15.0142
75	TCGA-AA-3496-01A	Low-Score	53.7152
76	TCGA-AA-3502-01A	Low-Score	13.2533
77	TCGA-AA-3506-01A	Low-Score	28.5697
78	TCGA-AA-3509-01A	Low-Score	16.9102
79	TCGA-AA-3510-01A	Low-Score	32.9327
80	TCGA-AA-3511-01A	Low-Score	34.714
81	TCGA-AA-3514-01A	Low-Score	25.5532
82	TCGA-AA-3516-01A	High-Score	77.4566
83	TCGA-AA-3517-01A	Low-Score	33.254
84	TCGA-AA-3518-01A	Low-Score	22.8511
85	TCGA-AA-3519-01A	Low-Score	23.2847
86	TCGA-AA-3520-01A	Low-Score	33.8712
87	TCGA-AA-3522-01A	Low-Score	10.2626
88	TCGA-AA-3524-01A	Low-Score	27.2567
89	TCGA-AA-3526-01A	Low-Score	18.2349
90	TCGA-AA-3530-01A	Low-Score	11.684
91	TCGA-AA-3531-01A	Low-Score	11.1722
92	TCGA-AA-3532-01A	Low-Score	20.8322
93	TCGA-AA-3534-01A	Low-Score	21.9129
94	TCGA-AA-3538-01A	Low-Score	18.2919
95	TCGA-AA-3542-01A	Low-Score	7.82644
96	TCGA-AA-3544-01A	Low-Score	19.4977
97	TCGA-AA-3548-01A	Low-Score	12.7015
98	TCGA-AA-3549-01A	High-Score	122.33
99	TCGA-AA-3552-01A	Low-Score	14.0595
100	TCGA-AA-3553-01A	Low-Score	47.4325
101	TCGA-AA-3554-01A	High-Score	120.635
102	TCGA-AA-3555-01A	Low-Score	57.8348
103	TCGA-AA-3556-01A	Low-Score	9.21081
104	TCGA-AA-3560-01A	Low-Score	18.1717
105	TCGA-AA-3561-01A	Low-Score	9.19996
106	TCGA-AA-3562-01A	Low-Score	15.1097
107	TCGA-AA-3655-01A	Low-Score	18.1744
108	TCGA-AA-3660-01A	Low-Score	10.5545
109	TCGA-AA-3662-01A	Low-Score	20.389
110	TCGA-AA-3663-01A	Low-Score	25.3431
111	TCGA-AA-3664-01A	Low-Score	30.2295
112	TCGA-AA-3666-01A	Low-Score	32.3128
113	TCGA-AA-3667-01A	Low-Score	20.3625
114	TCGA-AA-3673-01A	Low-Score	25.0992
115	TCGA-AA-3675-01A	Low-Score	19.1193
116	TCGA-AA-3678-01A	Low-Score	10.5085
117	TCGA-AA-3679-01A	Low-Score	21.828
118	TCGA-AA-3680-01A	Low-Score	33.7717
119	TCGA-AA-3681-01A	Low-Score	32.6985
120	TCGA-AA-3685-01A	Low-Score	22.5368
121	TCGA-AA-3688-01A	Low-Score	13.5718
122	TCGA-AA-3692-01A	Low-Score	32.6099
123	TCGA-AA-3696-01A	Low-Score	34.163
124	TCGA-AA-3697-01A	Low-Score	43.1033
125	TCGA-AA-3710-01A	Low-Score	42.6652
126	TCGA-AA-3713-01A	Low-Score	63.4188
127	TCGA-AA-3715-01A	High-Score	157.383
128	TCGA-AA-3811-01A	High-Score	135.265
129	TCGA-AA-3812-01A	Low-Score	49.0985
130	TCGA-AA-3815-01A	Low-Score	30.9917
131	TCGA-AA-3819-01A	Low-Score	17.7309
132	TCGA-AA-3821-01A	Low-Score	23.3737
133	TCGA-AA-3831-01A	Low-Score	33.4315
134	TCGA-AA-3833-01A	High-Score	139.388
135	TCGA-AA-3837-01A	Low-Score	35.8764
136	TCGA-AA-3841-01A	Low-Score	60.2809
137	TCGA-AA-3842-01A	Low-Score	29.1287
138	TCGA-AA-3844-01A	Low-Score	10.5937
139	TCGA-AA-3846-01A	Low-Score	28.4623
140	TCGA-AA-3848-01A	Low-Score	21.0341
141	TCGA-AA-3851-01A	Low-Score	19.5903
142	TCGA-AA-3854-01A	Low-Score	9.44833
143	TCGA-AA-3855-01A	Low-Score	18.5591
144	TCGA-AA-3858-01A	Low-Score	18.6266
145	TCGA-AA-3860-01A	High-Score	91.7776
146	TCGA-AA-3861-01A	Low-Score	11.4504
147	TCGA-AA-3862-01A	Low-Score	52.4225
148	TCGA-AA-3864-01A	Low-Score	35.6056
149	TCGA-AA-3866-01A	Low-Score	46.0326
150	TCGA-AA-3867-01A	Low-Score	54.5418
151	TCGA-AA-3869-01A	Low-Score	13.4249
152	TCGA-AA-3870-01A	High-Score	131.186
153	TCGA-AA-3875-01A	Low-Score	15.7907
154	TCGA-AA-3877-01A	Low-Score	42.473
155	TCGA-AA-3930-01A	High-Score	111.274
156	TCGA-AA-3939-01A	High-Score	83.8637
157	TCGA-AA-3941-01A	Low-Score	16.8497
158	TCGA-AA-3947-01A	Low-Score	40.2982
159	TCGA-AA-3949-01A	High-Score	84.8053
160	TCGA-AA-3950-01A	High-Score	172.483
161	TCGA-AA-3952-01A	Low-Score	50.3138
162	TCGA-AA-3955-01A	Low-Score	23.5873
163	TCGA-AA-3956-01A	Low-Score	33.9148
164	TCGA-AA-3966-01A	High-Score	114.979
165	TCGA-AA-3968-01A	Low-Score	18.0917
166	TCGA-AA-3970-01A	Low-Score	18.7327
167	TCGA-AA-3971-01A	Low-Score	15.3125
168	TCGA-AA-3972-01A	Low-Score	25.4879
169	TCGA-AA-3973-01A	Low-Score	28.8376
170	TCGA-AA-3975-01A	Low-Score	18.3414
171	TCGA-AA-3976-01A	Low-Score	29.0427
172	TCGA-AA-3977-01A	Low-Score	31.0558
173	TCGA-AA-3979-01A	Low-Score	18.3624
174	TCGA-AA-3980-01A	Low-Score	8.22027
175	TCGA-AA-3982-01A	Low-Score	19.0855
176	TCGA-AA-3986-01A	Low-Score	15.8805
177	TCGA-AA-3989-01A	Low-Score	33.858
178	TCGA-AA-3994-01A	High-Score	94.4283
179	TCGA-AA-A004-01A	Low-Score	38.7745
180	TCGA-AA-A00A-01A	Low-Score	59.5281
181	TCGA-AA-A00D-01A	Low-Score	21.0507
182	TCGA-AA-A00E-01A	Low-Score	55.0185
183	TCGA-AA-A00F-01A	High-Score	261.195
184	TCGA-AA-A00J-01A	High-Score	110.555
185	TCGA-AA-A00K-01A	Low-Score	28.5619
186	TCGA-AA-A00L-01A	Low-Score	12.1474
187	TCGA-AA-A00N-01A	High-Score	123.16
188	TCGA-AA-A00O-01A	Low-Score	40.9352
189	TCGA-AA-A00Q-01A	Low-Score	23.4962
190	TCGA-AA-A00U-01A	Low-Score	43.2981
191	TCGA-AA-A00W-01A	Low-Score	13.519
192	TCGA-AA-A00Z-01A	Low-Score	10.0964
193	TCGA-AA-A010-01A	Low-Score	46.4452
194	TCGA-AA-A017-01A	Low-Score	24.1898
195	TCGA-AA-A01C-01A	Low-Score	32.5615
196	TCGA-AA-A01D-01A	High-Score	76.0531
197	TCGA-AA-A01F-01A	Low-Score	11.3218
198	TCGA-AA-A01G-01A	Low-Score	11.3963
199	TCGA-AA-A01I-01A	Low-Score	18.1366
200	TCGA-AA-A01K-01A	Low-Score	50.8132
201	TCGA-AA-A01P-01A	Low-Score	56.1554
202	TCGA-AA-A01Q-01A	Low-Score	14.1795
203	TCGA-AA-A01R-01A	High-Score	137.751
204	TCGA-AA-A01S-01A	Low-Score	4.2687
205	TCGA-AA-A01T-01A	Low-Score	16.5525
206	TCGA-AA-A01V-01A	Low-Score	22.0144
207	TCGA-AA-A01X-01A	Low-Score	35.7371
208	TCGA-AA-A01Z-01A	Low-Score	27.8756
209	TCGA-AA-A024-01A	Low-Score	10.1397
210	TCGA-AA-A029-01A	Low-Score	9.97151
211	TCGA-AA-A02E-01A	Low-Score	36.714
212	TCGA-AA-A02F-01A	Low-Score	56.6897
213	TCGA-AA-A02H-01A	Low-Score	32.2718
214	TCGA-AA-A02J-01A	Low-Score	10.5337
215	TCGA-AA-A02K-01A	Low-Score	30.5462
216	TCGA-AA-A02R-01A	High-Score	89.0527
217	TCGA-AA-A02W-01A	Low-Score	20.7151
218	TCGA-AA-A02Y-01A	Low-Score	4.39926
219	TCGA-AA-A03J-01A	Low-Score	14.4023
220	TCGA-AD-5900-01A	Low-Score	34.2296
221	TCGA-AD-6548-01A	High-Score	97.8515
222	TCGA-AD-6888-01A	Low-Score	10.4518
223	TCGA-AD-6889-01A	High-Score	77.6236
224	TCGA-AD-6890-01A	High-Score	78.2019
225	TCGA-AD-6895-01A	High-Score	121.666
226	TCGA-AD-6899-01A	High-Score	95.0218
227	TCGA-AD-6901-01A	High-Score	930.802
228	TCGA-AD-6963-01A	Low-Score	56.6865
229	TCGA-AD-6964-01A	High-Score	303.848
230	TCGA-AD-6965-01A	Low-Score	41.0614
231	TCGA-AD-A5EK-01A	Low-Score	17.6069
232	TCGA-AU-3779-01A	Low-Score	44.8054
233	TCGA-AU-6004-01A	High-Score	79.2112
234	TCGA-AY-4070-01A	High-Score	88.0846
235	TCGA-AY-5543-01A	Low-Score	16.0235
236	TCGA-AY-6197-01A	High-Score	123.052
237	TCGA-AY-6386-01A	Low-Score	49.0446
238	TCGA-AY-A54L-01A	Low-Score	61.1038
239	TCGA-AY-A69D-01A	Low-Score	36.3466
240	TCGA-AY-A71X-01A	Low-Score	4.76187
241	TCGA-AY-A8YK-01A	Low-Score	36.0117
242	TCGA-AZ-4308-01A	Low-Score	48.2805
243	TCGA-AZ-4313-01A	Low-Score	16.3213
244	TCGA-AZ-4315-01A	Low-Score	38.8132
245	TCGA-AZ-4323-01A	High-Score	211.789
246	TCGA-AZ-4614-01A	High-Score	92.0377
247	TCGA-AZ-4615-01A	Low-Score	62.8971
248	TCGA-AZ-4616-01A	High-Score	170.921
249	TCGA-AZ-4682-01B	Low-Score	56.8595
250	TCGA-AZ-4684-01A	High-Score	157.422
251	TCGA-AZ-5403-01A	High-Score	137.216
252	TCGA-AZ-5407-01A	Low-Score	18.9869
253	TCGA-AZ-6598-01A	High-Score	87.7663
254	TCGA-AZ-6599-01A	Low-Score	13.1786
255	TCGA-AZ-6600-01A	High-Score	163.804
256	TCGA-AZ-6601-01A	High-Score	111.152
257	TCGA-AZ-6603-01A	Low-Score	33.2913
258	TCGA-AZ-6605-01A	High-Score	72.2216
259	TCGA-AZ-6606-01A	Low-Score	26.8865
260	TCGA-AZ-6607-01A	High-Score	2256.81
261	TCGA-AZ-6608-01A	Low-Score	8.39679
262	TCGA-CA-5254-01A	Low-Score	15.1568
263	TCGA-CA-5255-01A	Low-Score	30.6796
264	TCGA-CA-5256-01A	Low-Score	5.11621
265	TCGA-CA-5796-01A	Low-Score	6.56188
266	TCGA-CA-5797-01A	Low-Score	20.2731
267	TCGA-CA-6715-01A	Low-Score	19.2008
268	TCGA-CA-6716-01A	Low-Score	37.1013
269	TCGA-CA-6717-01A	High-Score	78.8358
270	TCGA-CA-6718-01A	High-Score	147.95
271	TCGA-CA-6719-01A	High-Score	155.49
272	TCGA-CK-4947-01B	Low-Score	27.2028
273	TCGA-CK-4948-01B	Low-Score	35.7457
274	TCGA-CK-4950-01A	Low-Score	53.1588
275	TCGA-CK-4951-01A	Low-Score	56.488
276	TCGA-CK-4952-01A	Low-Score	59.3249
277	TCGA-CK-5912-01A	Low-Score	18.7243
278	TCGA-CK-5913-01A	High-Score	97.4066
279	TCGA-CK-5914-01A	Low-Score	20.3412
280	TCGA-CK-5916-01A	Low-Score	46.6629
281	TCGA-CK-6747-01A	Low-Score	30.7
282	TCGA-CK-6748-01A	High-Score	103.249
283	TCGA-CK-6751-01A	Low-Score	43.4874
284	TCGA-CM-4743-01A	Low-Score	34.0488
285	TCGA-CM-4744-01A	Low-Score	13.4008
286	TCGA-CM-4746-01A	Low-Score	14.278
287	TCGA-CM-4747-01A	Low-Score	26.7434
288	TCGA-CM-4748-01A	Low-Score	60.5235
289	TCGA-CM-4750-01A	Low-Score	23.5232
290	TCGA-CM-4751-01A	High-Score	167.144
291	TCGA-CM-4752-01A	Low-Score	37.1367
292	TCGA-CM-5341-01A	Low-Score	49.6675
293	TCGA-CM-5344-01A	High-Score	69.8507
294	TCGA-CM-5348-01A	High-Score	86.2537
295	TCGA-CM-5349-01A	Low-Score	47.0556
296	TCGA-CM-5860-01A	Low-Score	33.0806
297	TCGA-CM-5861-01A	Low-Score	55.7797
298	TCGA-CM-5862-01A	Low-Score	35.4171
299	TCGA-CM-5863-01A	High-Score	154.05
300	TCGA-CM-5864-01A	Low-Score	16.0404
301	TCGA-CM-5868-01A	High-Score	297.331
302	TCGA-CM-6161-01A	Low-Score	25.4252
303	TCGA-CM-6162-01A	High-Score	582.745
304	TCGA-CM-6163-01A	Low-Score	38.543
305	TCGA-CM-6164-01A	Low-Score	65.3393
306	TCGA-CM-6165-01A	Low-Score	36.4884
307	TCGA-CM-6166-01A	Low-Score	24.4908
308	TCGA-CM-6167-01A	High-Score	210.341
309	TCGA-CM-6168-01A	High-Score	86.6132
310	TCGA-CM-6169-01A	High-Score	90.9912
311	TCGA-CM-6170-01A	Low-Score	30.4378
312	TCGA-CM-6171-01A	High-Score	133.988
313	TCGA-CM-6172-01A	Low-Score	18.5122
314	TCGA-CM-6674-01A	Low-Score	42.8858
315	TCGA-CM-6675-01A	Low-Score	55.0617
316	TCGA-CM-6676-01A	Low-Score	61.0901
317	TCGA-CM-6677-01A	Low-Score	53.2394
318	TCGA-CM-6678-01A	High-Score	67.3406
319	TCGA-CM-6679-01A	High-Score	115.886
320	TCGA-CM-6680-01A	Low-Score	32.2984
321	TCGA-D5-5537-01A	Low-Score	50.5638
322	TCGA-D5-5538-01A	High-Score	138.68
323	TCGA-D5-5539-01A	High-Score	88.6544
324	TCGA-D5-5540-01A	Low-Score	18.153
325	TCGA-D5-5541-01A	Low-Score	41.3978
326	TCGA-D5-6529-01A	Low-Score	26.0915
327	TCGA-D5-6530-01A	Low-Score	29.0048
328	TCGA-D5-6531-01A	Low-Score	22.6363
329	TCGA-D5-6532-01A	Low-Score	15.2773
330	TCGA-D5-6533-01A	Low-Score	15.3398
331	TCGA-D5-6534-01A	High-Score	360.641
332	TCGA-D5-6535-01A	Low-Score	31.7435
333	TCGA-D5-6536-01A	High-Score	236.907
334	TCGA-D5-6537-01A	Low-Score	22.9306
335	TCGA-D5-6538-01A	Low-Score	9.45145
336	TCGA-D5-6539-01A	Low-Score	31.6236
337	TCGA-D5-6540-01A	Low-Score	49.1431
338	TCGA-D5-6541-01A	Low-Score	32.7186
339	TCGA-D5-6898-01A	High-Score	68.1856
340	TCGA-D5-6920-01A	High-Score	89.1795
341	TCGA-D5-6922-01A	Low-Score	33.4133
342	TCGA-D5-6923-01A	High-Score	155.261
343	TCGA-D5-6924-01A	High-Score	78.6754
344	TCGA-D5-6926-01A	High-Score	106.702
345	TCGA-D5-6927-01A	High-Score	119.698
346	TCGA-D5-6928-01A	High-Score	79.7925
347	TCGA-D5-6929-01A	Low-Score	30.4152
348	TCGA-D5-6930-01A	Low-Score	63.7329
349	TCGA-D5-6931-01A	Low-Score	51.0667
350	TCGA-D5-6932-01A	High-Score	74.8901
351	TCGA-D5-7000-01A	Low-Score	38.3834
352	TCGA-DM-A0X9-01A	Low-Score	9.64525
353	TCGA-DM-A0XD-01A	Low-Score	30.9877
354	TCGA-DM-A0XF-01A	Low-Score	51.6752
355	TCGA-DM-A1D0-01A	Low-Score	5.38227
356	TCGA-DM-A1D4-01A	Low-Score	3.60508
357	TCGA-DM-A1D6-01A	Low-Score	16.2644
358	TCGA-DM-A1D7-01A	Low-Score	11.995
359	TCGA-DM-A1D8-01A	Low-Score	5.49756
360	TCGA-DM-A1D9-01A	Low-Score	23.1308
361	TCGA-DM-A1DA-01A	Low-Score	14.8601
362	TCGA-DM-A1DB-01A	Low-Score	13.2368
363	TCGA-DM-A1HA-01A	High-Score	78.6402
364	TCGA-DM-A1HB-01A	Low-Score	60.7882
365	TCGA-DM-A280-01A	Low-Score	54.6129
366	TCGA-DM-A282-01A	Low-Score	11.0924
367	TCGA-DM-A285-01A	High-Score	66.701
368	TCGA-DM-A288-01A	Low-Score	22.8144
369	TCGA-DM-A28A-01A	High-Score	101.886
370	TCGA-DM-A28C-01A	Low-Score	15.9503
371	TCGA-DM-A28E-01A	Low-Score	7.74256
372	TCGA-DM-A28F-01A	Low-Score	17.9173
373	TCGA-DM-A28G-01A	Low-Score	5.64786
374	TCGA-DM-A28H-01A	Low-Score	10.5764
375	TCGA-DM-A28K-01A	Low-Score	14.7922
376	TCGA-DM-A28M-01A	Low-Score	18.7664
377	TCGA-F4-6459-01A	High-Score	357.074
378	TCGA-F4-6460-01A	Low-Score	23.9661
379	TCGA-F4-6461-01A	High-Score	66.9769
380	TCGA-F4-6463-01A	High-Score	85.7109
381	TCGA-F4-6569-01A	High-Score	148.233
382	TCGA-F4-6570-01A	High-Score	150.77
383	TCGA-F4-6703-01A	High-Score	755.131
384	TCGA-F4-6704-01A	High-Score	118.36
385	TCGA-F4-6805-01A	High-Score	108.549
386	TCGA-F4-6806-01A	Low-Score	22.0528
387	TCGA-F4-6807-01A	High-Score	276.775
388	TCGA-F4-6808-01A	Low-Score	40.8123
389	TCGA-F4-6809-01A	High-Score	684.651
390	TCGA-F4-6855-01A	High-Score	413.434
391	TCGA-F4-6856-01A	Low-Score	36.5347
392	TCGA-G4-6293-01A	Low-Score	33.83
393	TCGA-G4-6294-01A	Low-Score	28.6568
394	TCGA-G4-6295-01A	Low-Score	27.8455
395	TCGA-G4-6297-01A	High-Score	196.864
396	TCGA-G4-6299-01A	High-Score	232.833
397	TCGA-G4-6303-01A	Low-Score	48.3717
398	TCGA-G4-6304-01A	Low-Score	25.7736
399	TCGA-G4-6306-01A	Low-Score	11.9742
400	TCGA-G4-6307-01A	Low-Score	3.55561
401	TCGA-G4-6309-01A	Low-Score	38.6165
402	TCGA-G4-6310-01A	Low-Score	45.2517
403	TCGA-G4-6311-01A	High-Score	99.4581
404	TCGA-G4-6314-01A	High-Score	97.8331
405	TCGA-G4-6315-01A	Low-Score	15.5371
406	TCGA-G4-6317-01A	Low-Score	6.24995
407	TCGA-G4-6317-02A	Low-Score	28.7793
408	TCGA-G4-6320-01A	Low-Score	15.2954
409	TCGA-G4-6321-01A	Low-Score	22.0988
410	TCGA-G4-6322-01A	Low-Score	60.0129
411	TCGA-G4-6323-01A	Low-Score	13.4618
412	TCGA-G4-6586-01A	Low-Score	11.4783
413	TCGA-G4-6588-01A	Low-Score	37.4557
414	TCGA-G4-6625-01A	Low-Score	45.142
415	TCGA-G4-6627-01A	High-Score	140.236
416	TCGA-G4-6628-01A	Low-Score	62.7557
417	TCGA-NH-A50T-01A	Low-Score	13.4666
418	TCGA-NH-A50U-01A	Low-Score	25.0891
419	TCGA-NH-A50V-01A	Low-Score	66.5681
420	TCGA-NH-A6GA-01A	Low-Score	46.6846
421	TCGA-NH-A6GB-01A	Low-Score	25.5975
422	TCGA-NH-A6GC-01A	Low-Score	58.8454
423	TCGA-NH-A8F7-01A	Low-Score	7.93355
424	TCGA-NH-A8F7-06A	Low-Score	14.7429
425	TCGA-NH-A8F8-01A	Low-Score	47.5997
426	TCGA-QG-A5YV-01A	Low-Score	24.4359
427	TCGA-QG-A5YW-01A	Low-Score	29.1046
428	TCGA-QG-A5YX-01A	Low-Score	4.86145
429	TCGA-QG-A5Z1-01A	Low-Score	23.9179
430	TCGA-QG-A5Z2-01A	Low-Score	11.7748
431	TCGA-QL-A97D-01A	Low-Score	46.2121
432	TCGA-RU-A8FL-01A	Low-Score	6.92181
433	TCGA-SS-A7HO-01A	Low-Score	25.0379
434	TCGA-T9-A92H-01A	Low-Score	14.4252
435	TCGA-WS-AB45-01A	High-Score	952.768
